# Supplementary material for: Facile access to zinc and cadmium selones: highly active catalysts for Barbier reactions in aqueous media
Source: Royal Society of Chemistry journal article supplement (doi:10.1039/c5dt04871k), 2016-01-01
Supplement: c5dt04871k1.pdf [file c5dt04871k1.pdf]

## Supporting Information-I

### Facile Access to Zinc and Cadmium Selones: Highly Active Catalysts for Barbier Reactions in Aqueous Media

Chatla Naga Babu, Katam Srinivas and Ganesan Prabusankar\*

*a*. Department of Chemistry, Indian Institute of Technology Hyderabad, Kandi, Medak, TS, INDIA-502 285. Fax: +91 40 2301 6032; Tel: +91 40 2301 6089; E-mail: prabu@iith.ac.in.

**Figure S1.**  $^1\text{H}$  NMR spectrum of compound **L1** in  $\text{DMSO-d}_6$  at RT.

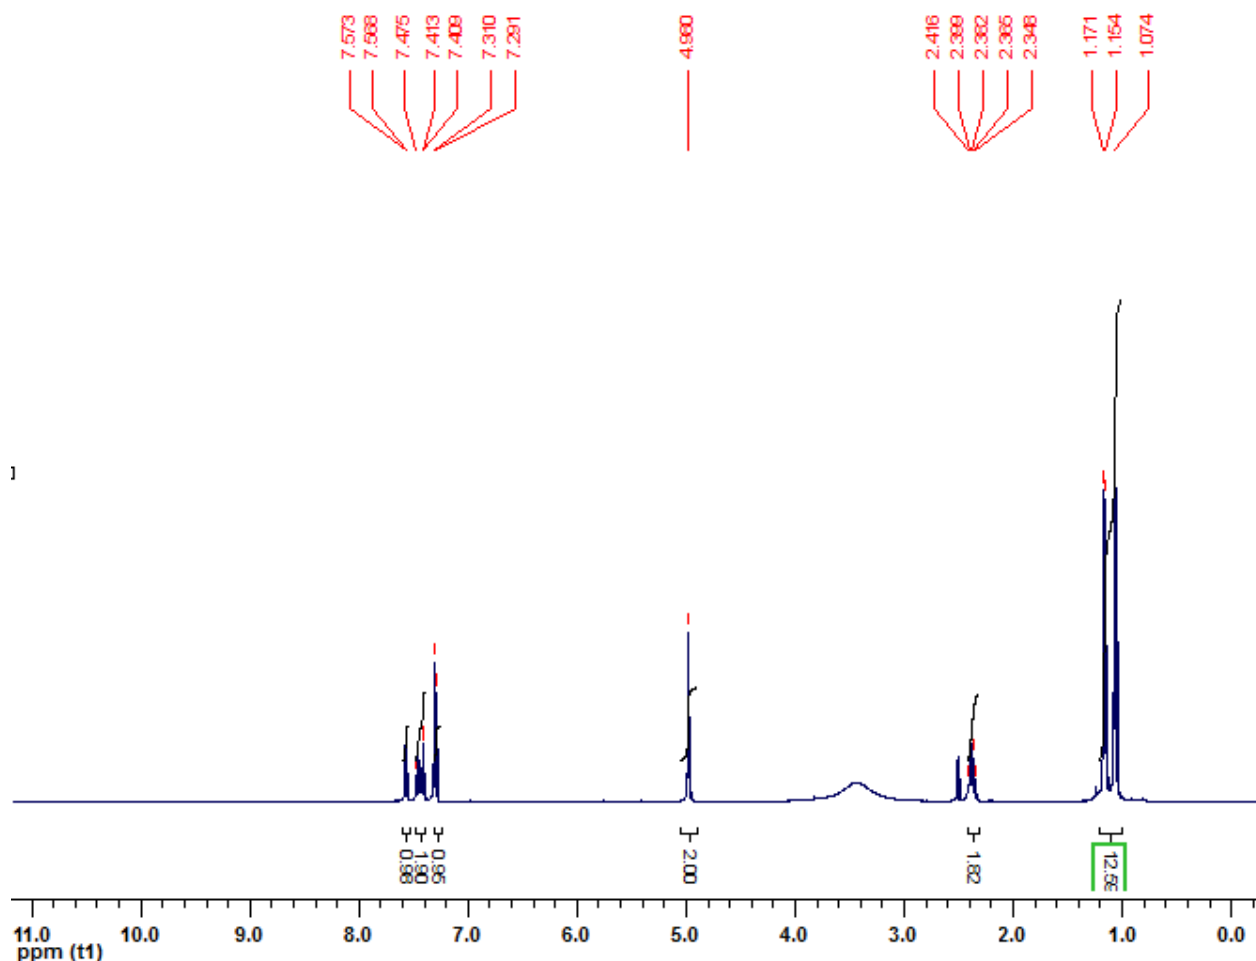

**Figure S2.**  $^{13}\text{C}$  NMR spectrum of compound **L1** in  $\text{DMSO-d}_6$  at RT.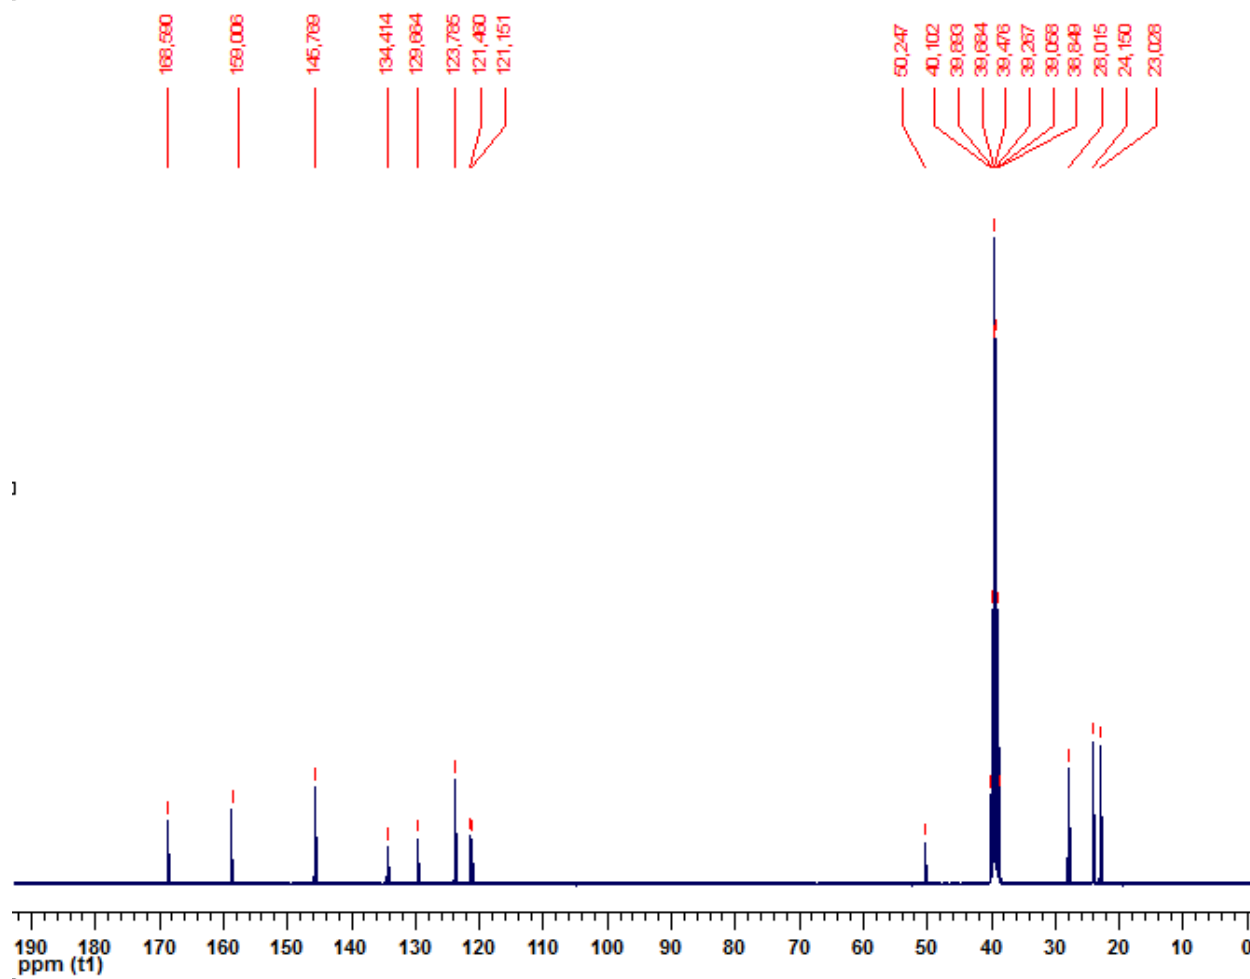

**Figure S3.**  $^1\text{H}$  NMR spectrum of compound **L2** in  $\text{DMSO-d}_6$  at RT.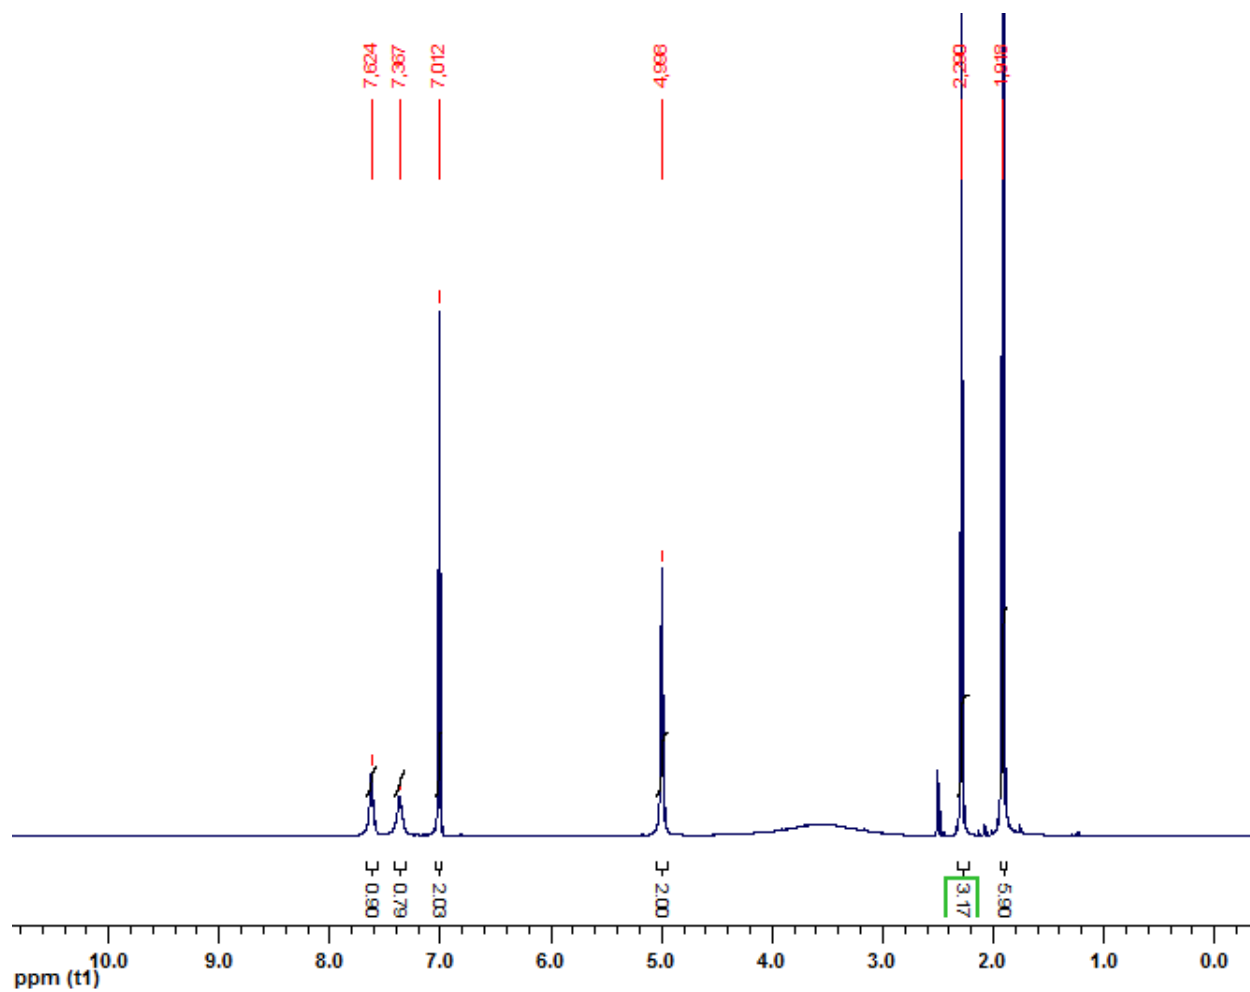

**Figure S4.**  $^{13}\text{C}$  NMR spectrum of compound **L2** in  $\text{DMSO-d}_6$  at RT.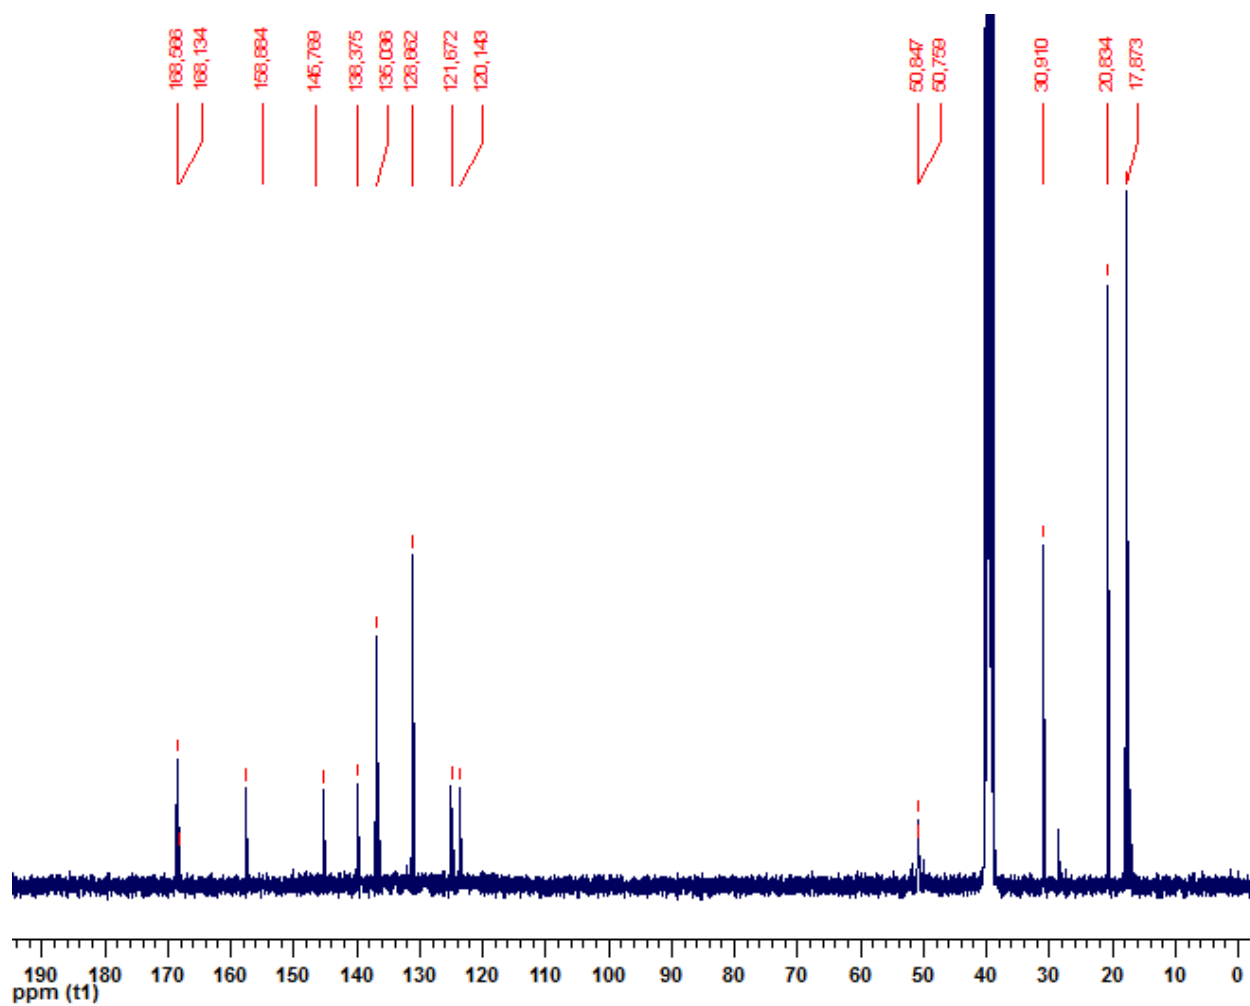

**Figure S5.**  $^1\text{H}$  NMR spectrum of compound **1** in  $\text{DMSO-d}_6$  at RT.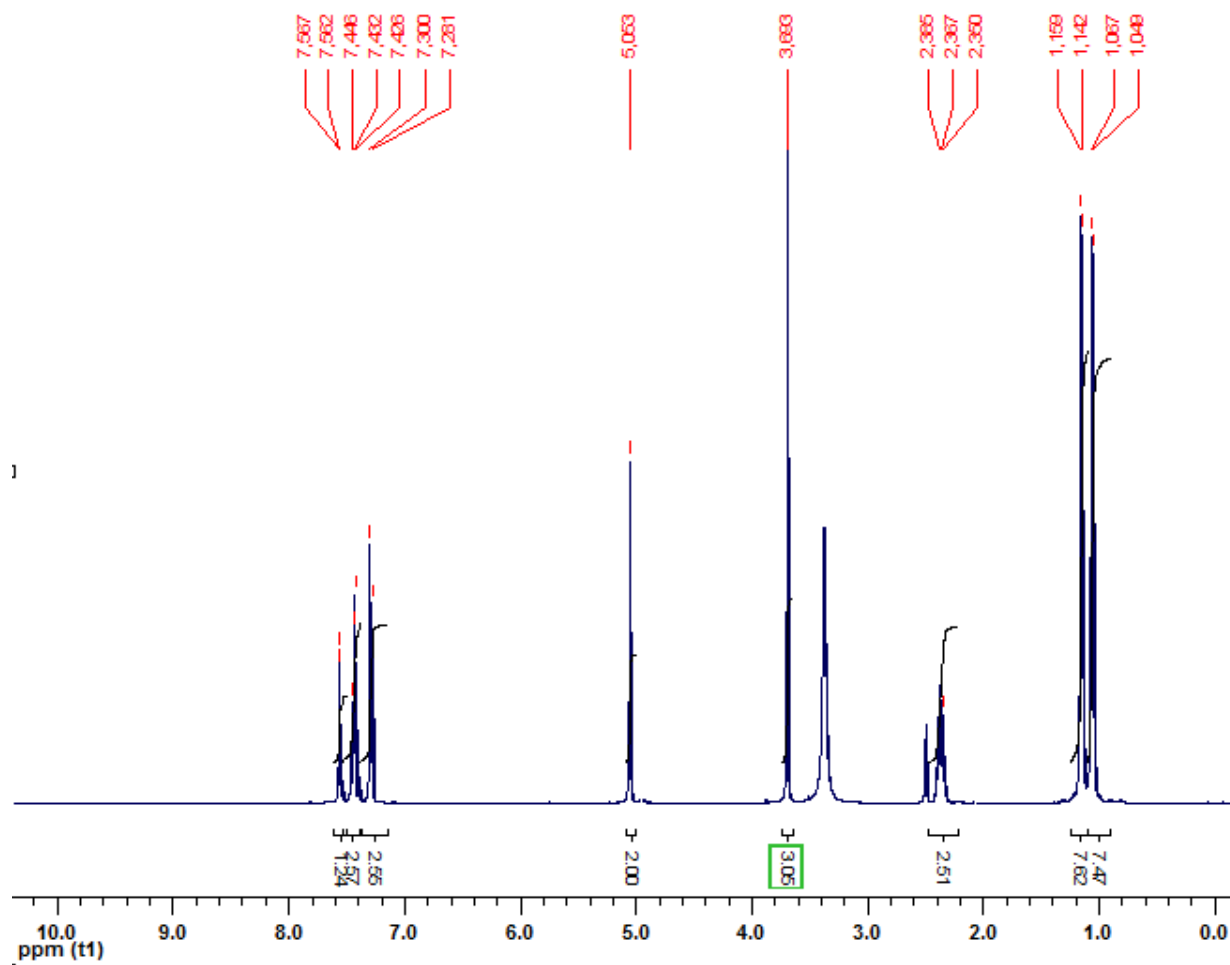

**Figure S6.**  $^{13}\text{C}$  NMR spectrum of compound **1** in DMSO- $d_6$  at RT.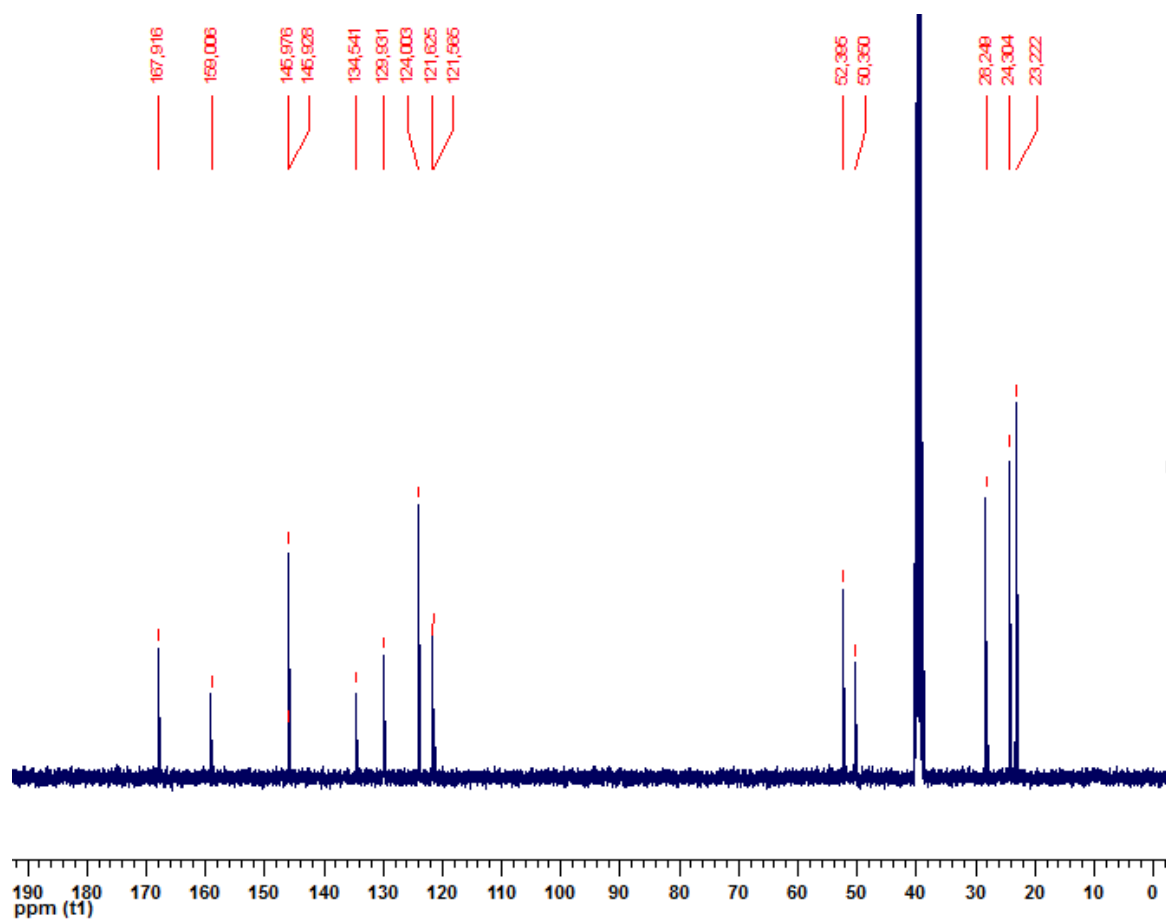

**Figure S7.**  $^1\text{H}$ NMR spectrum of compound **2** in  $\text{DMSO-d}_6$  at RT.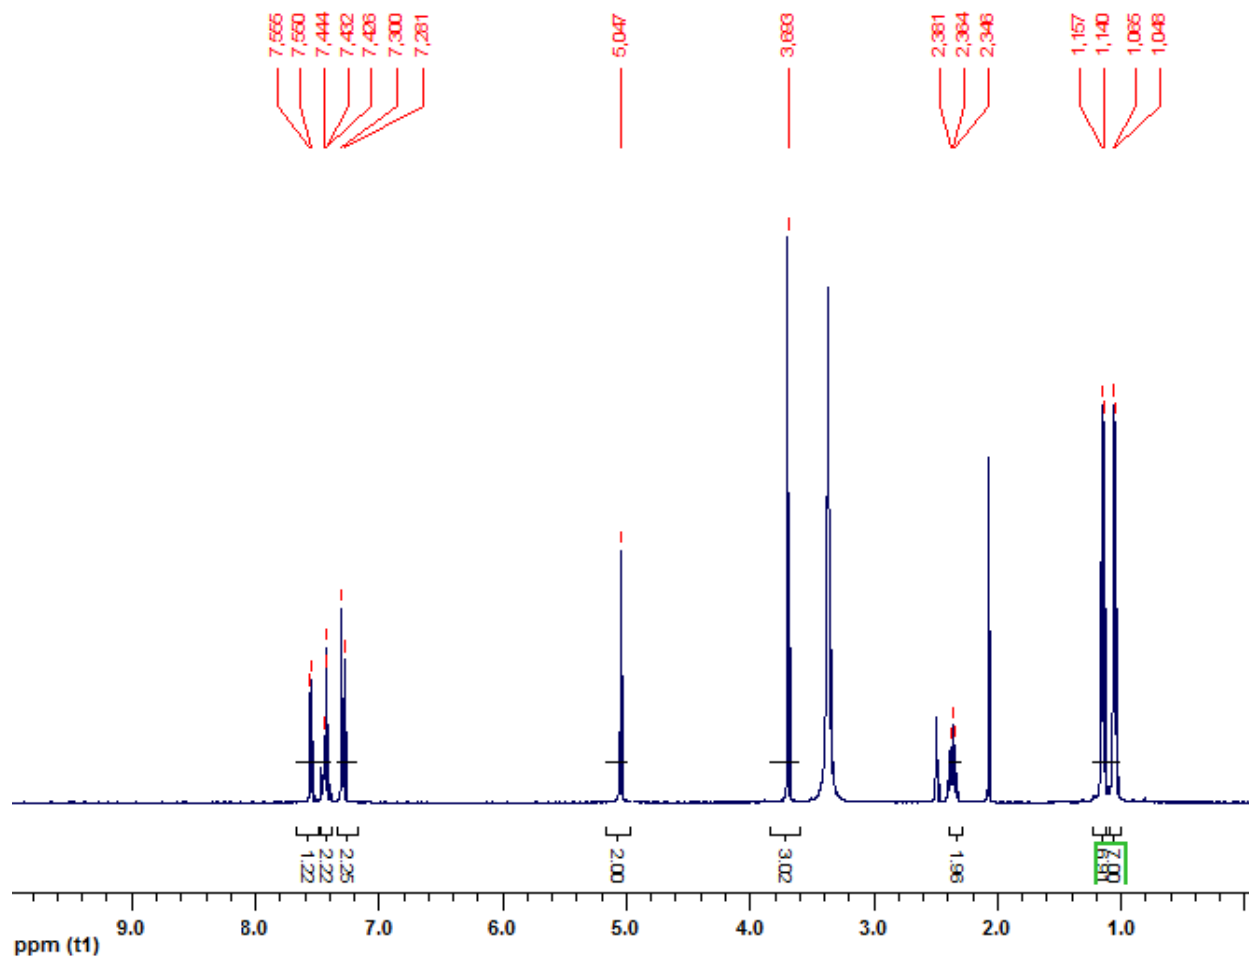

**Figure S8.**  $^{13}\text{C}$  NMR spectrum of compound **2** in  $\text{DMSO-d}_6$  at RT.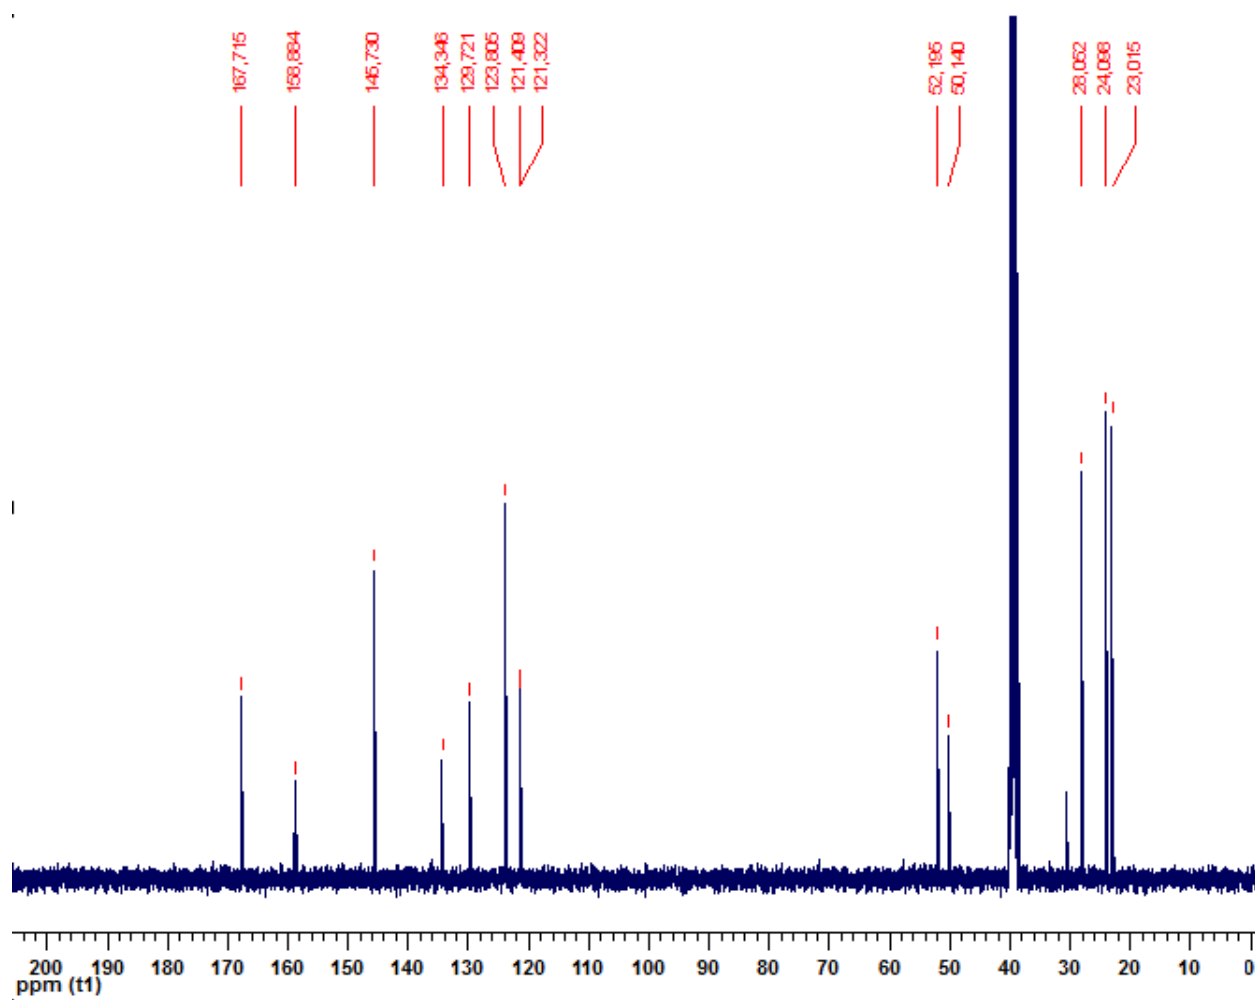



**Figure S9.**  $^1\text{H}$ NMR spectrum of compound **3** in  $\text{DMSO-d}_6$  at RT.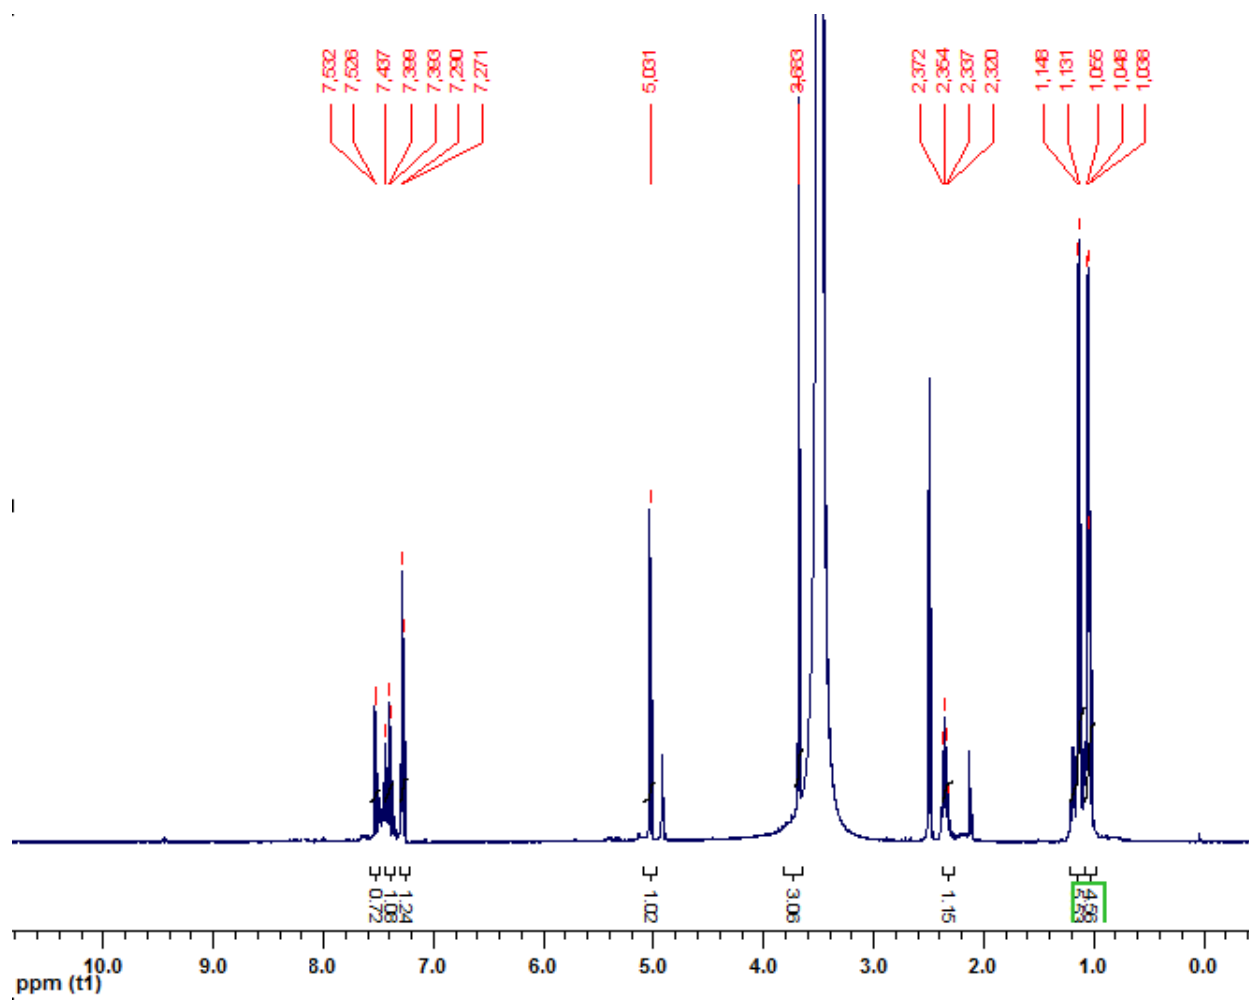

**Figure S10.**  $^{13}\text{C}$  NMR spectrum of compound **3** in  $\text{DMSO-d}_6$  at RT.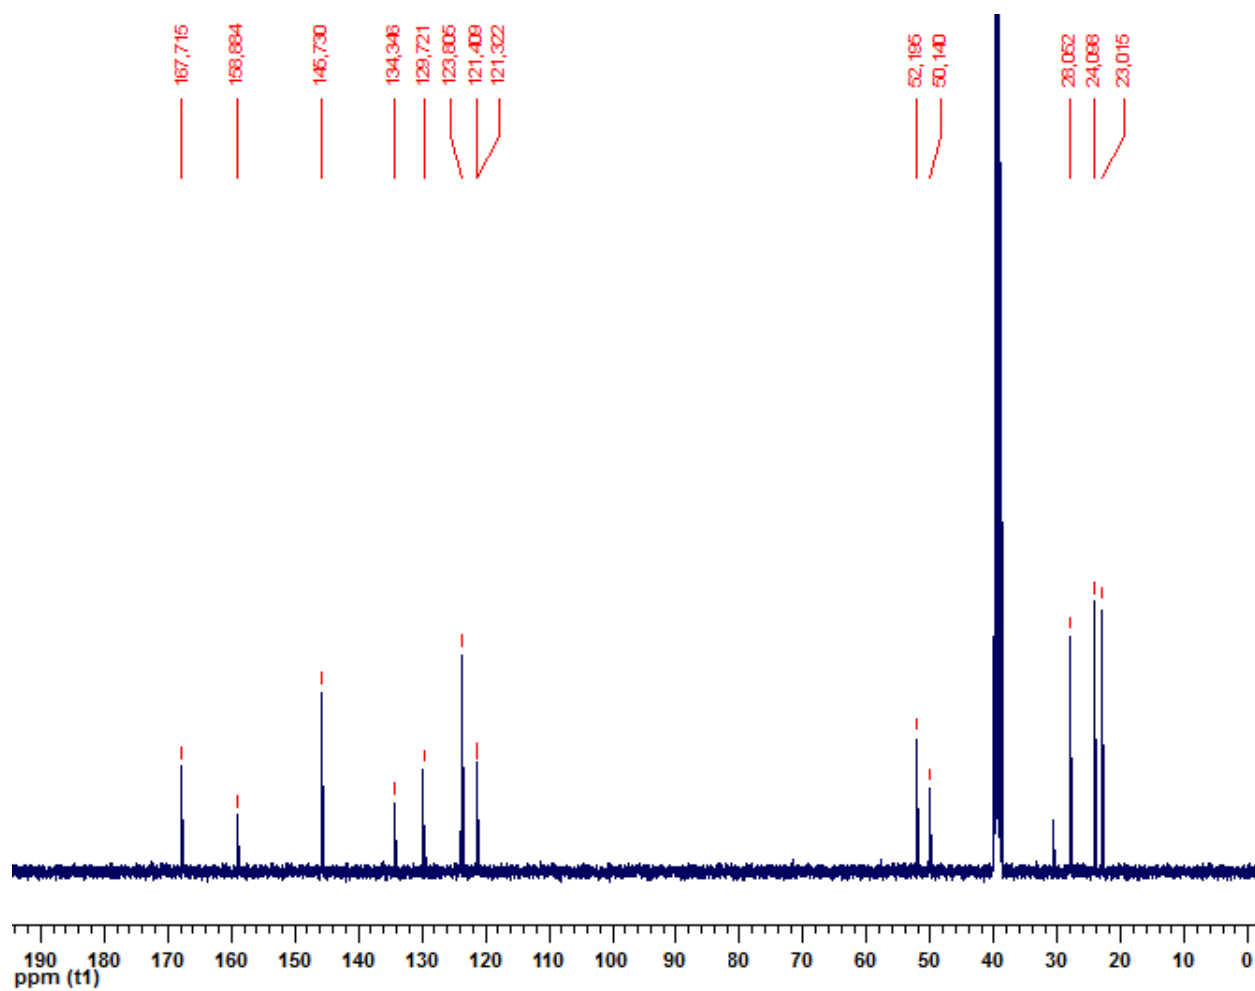

**Figure S11.**  $^1\text{H}$ NMR spectrum of compound **4** in DMSO- $d_6$  at RT.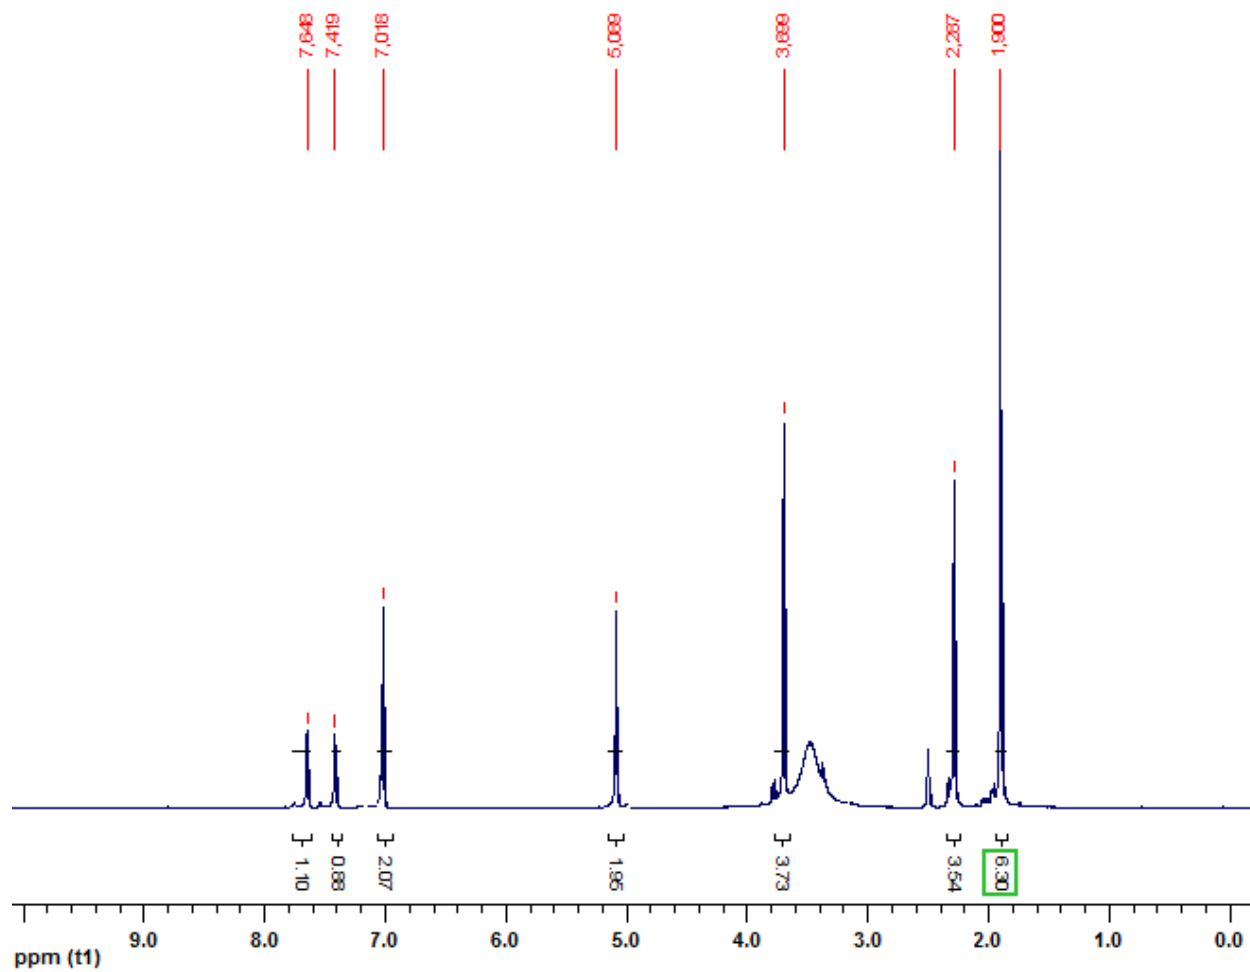

**Figure S12.**  $^{13}\text{C}$ NMR spectrum of compound **4** in DMSO- $d_6$  at RT.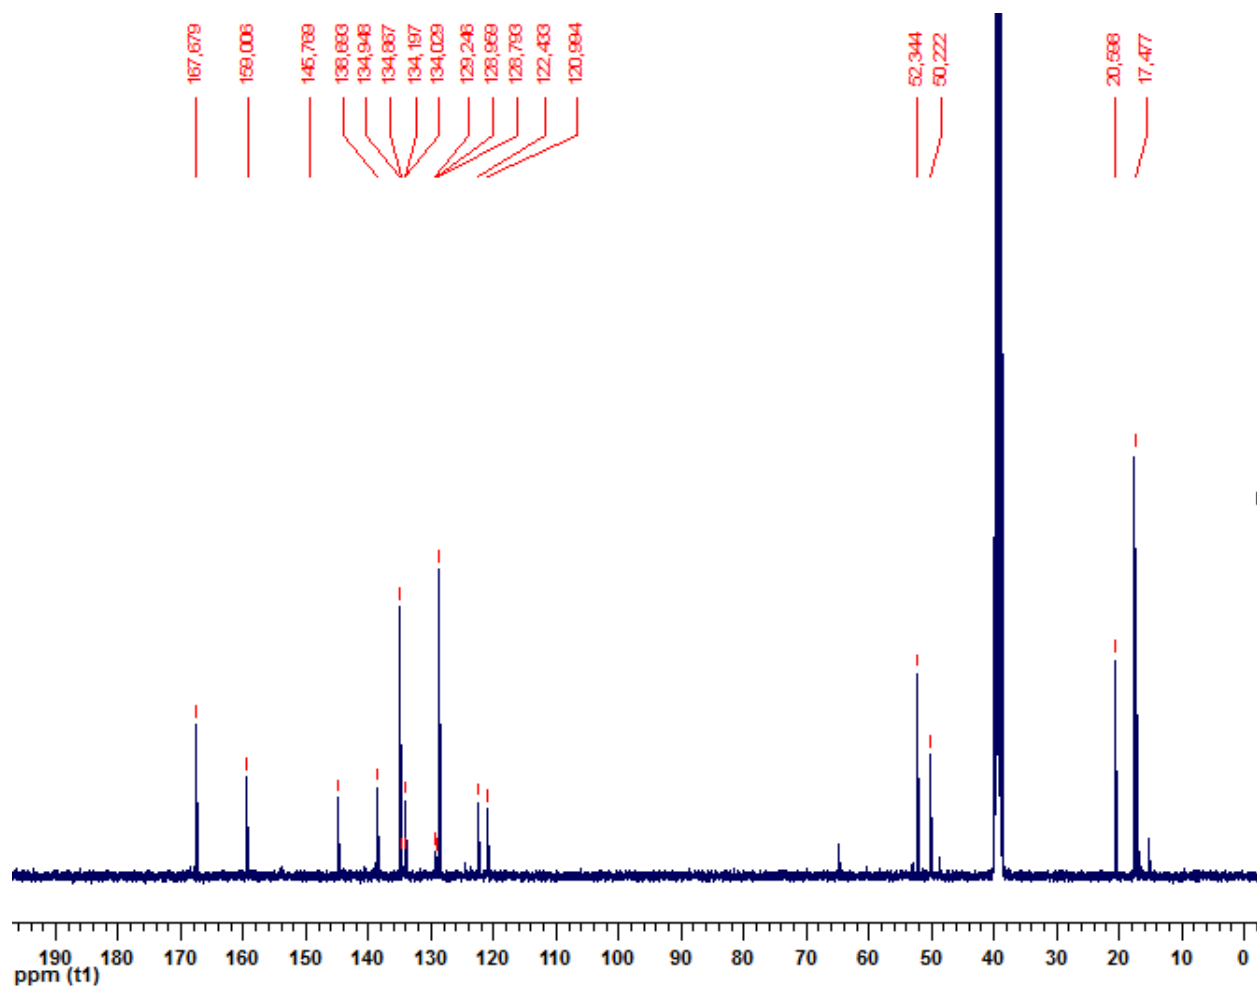

**Figure S13.**  $^1\text{H}$ NMR spectrum of compound **5** in  $\text{DMSO-d}_6$  at RT.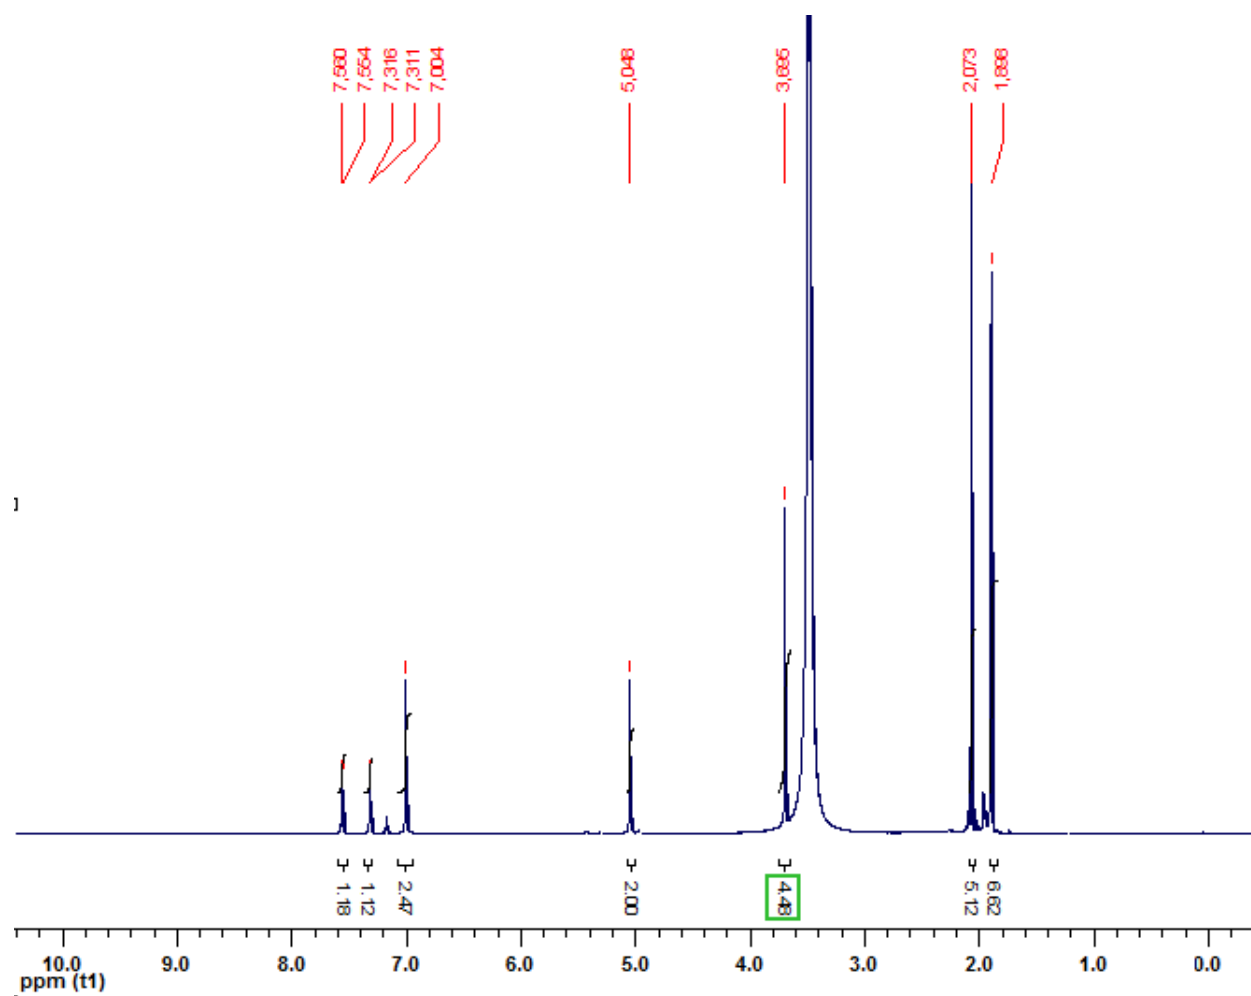

**Figure S14.**  $^{13}\text{C}$ NMR spectrum of compound **5** in  $\text{DMSO-d}_6$  at RT.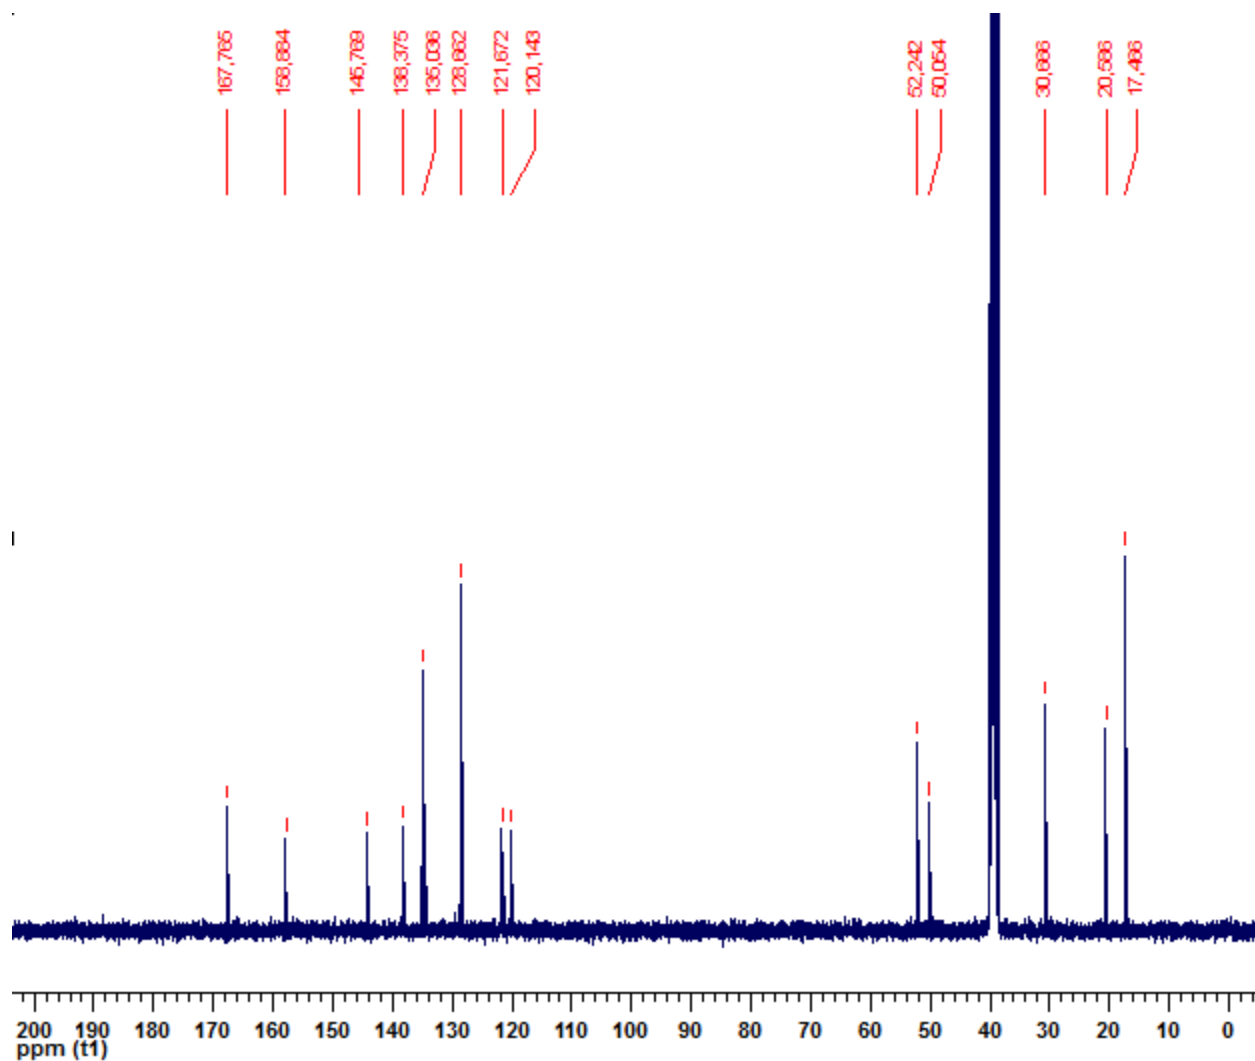

**Figure S15.**  $^1\text{H}$ NMR spectrum of compound **6** in  $\text{DMSO-d}_6$  at RT.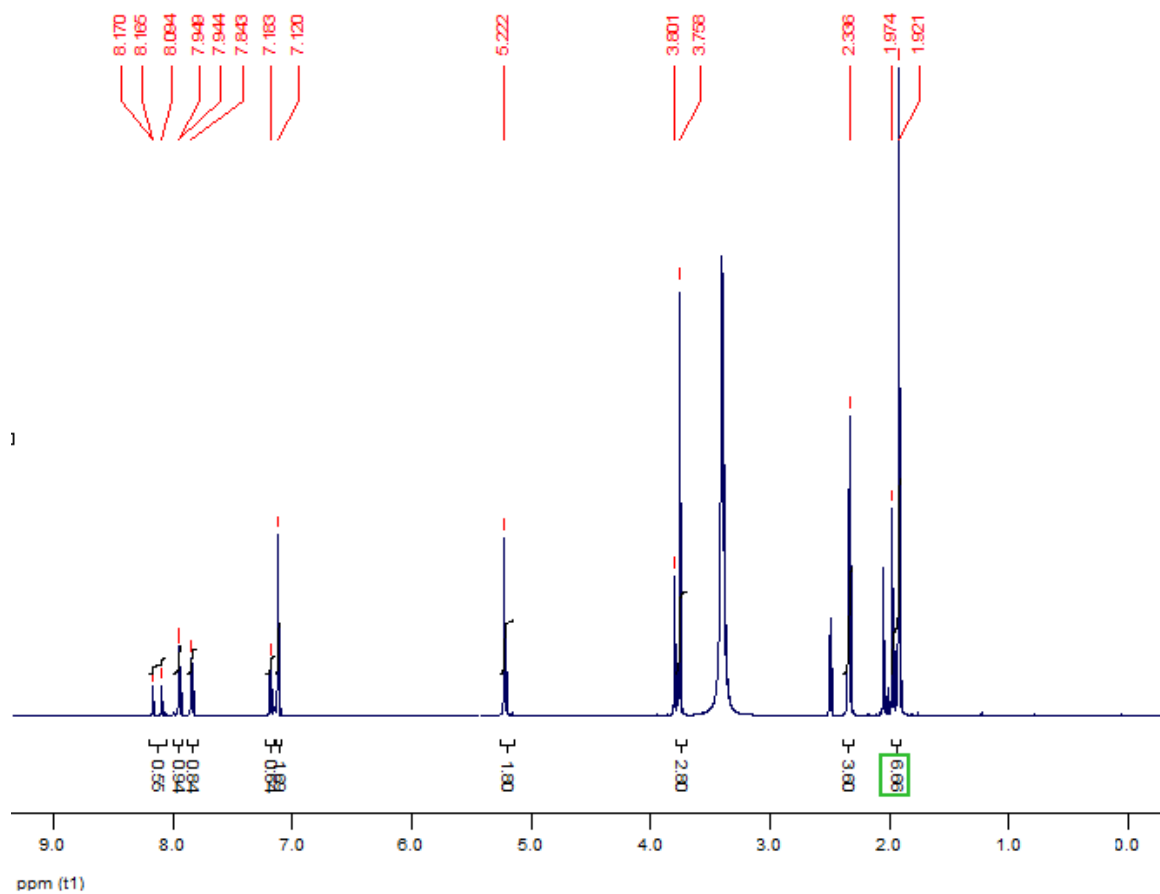

**Figure S16.**  $^{13}\text{C}$  NMR spectrum of compound **6** in  $\text{DMSO-d}_6$  at RT.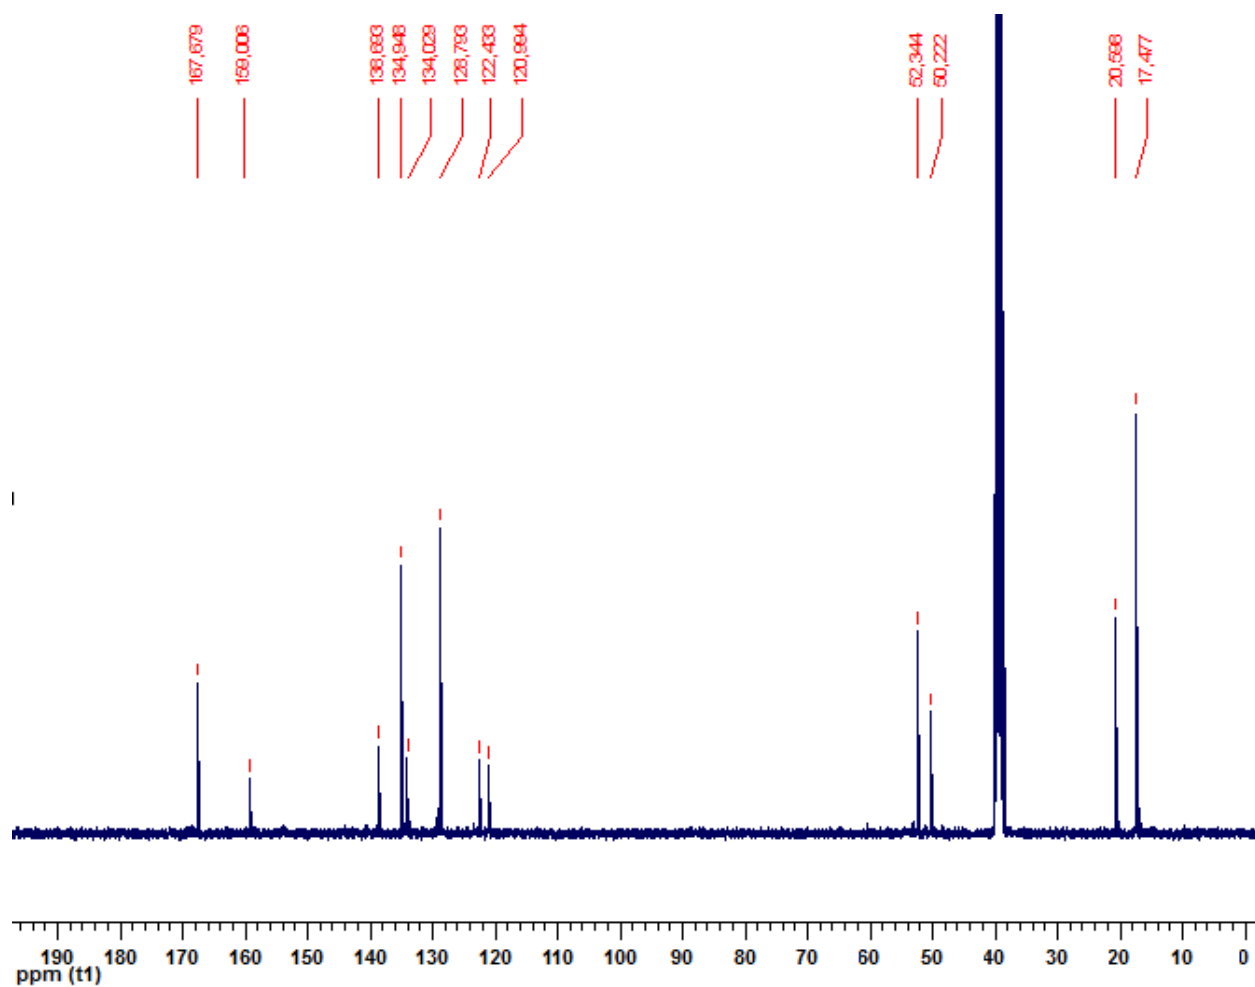



**Figure S17.** FT-IR spectrum of L1.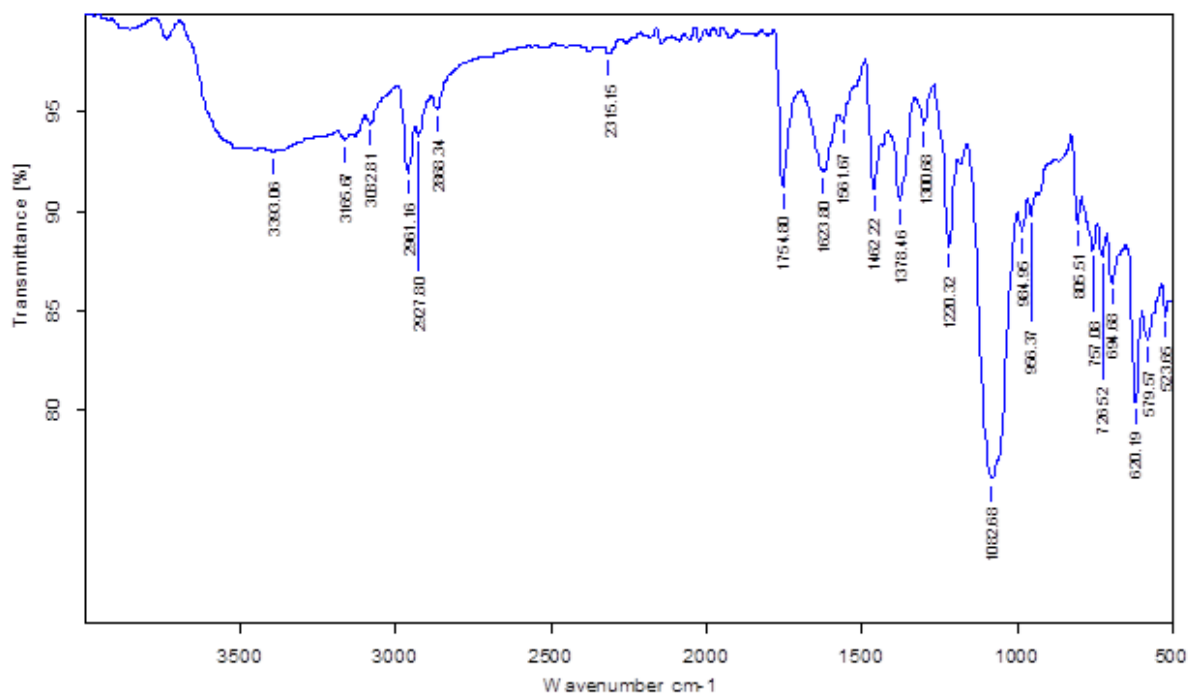**Figure S18.** FT-IR spectrum of L2.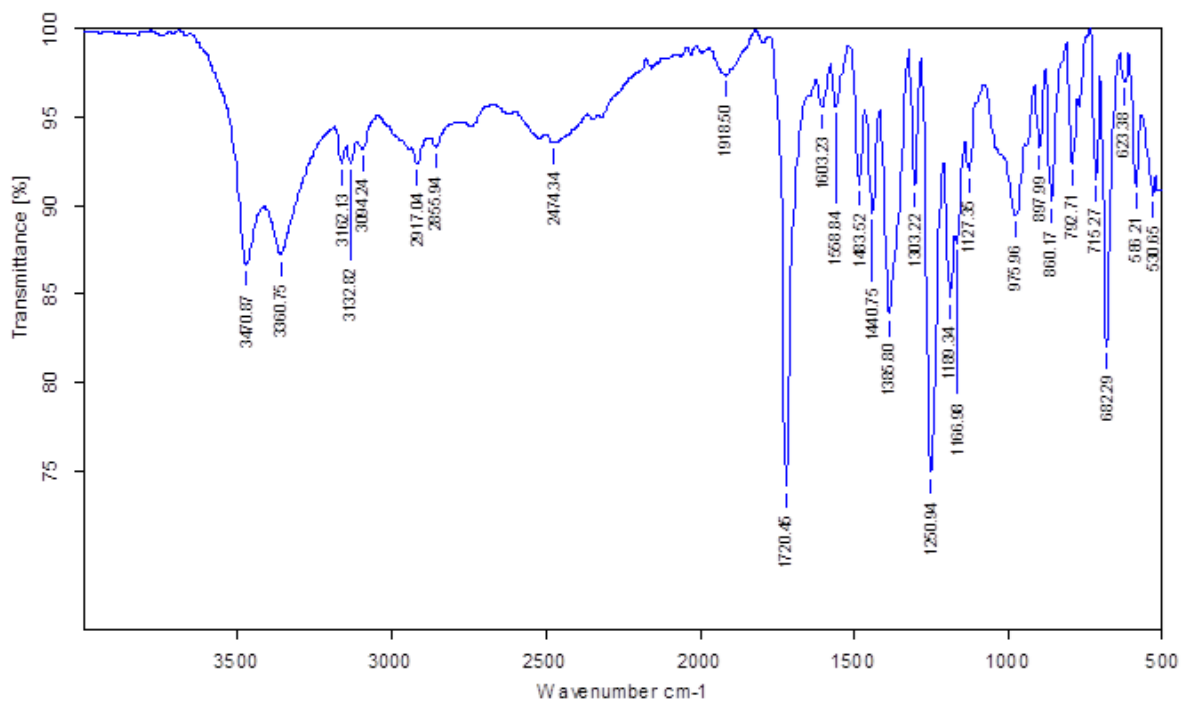

**Figure S19.** FT-IR spectrum of **1**.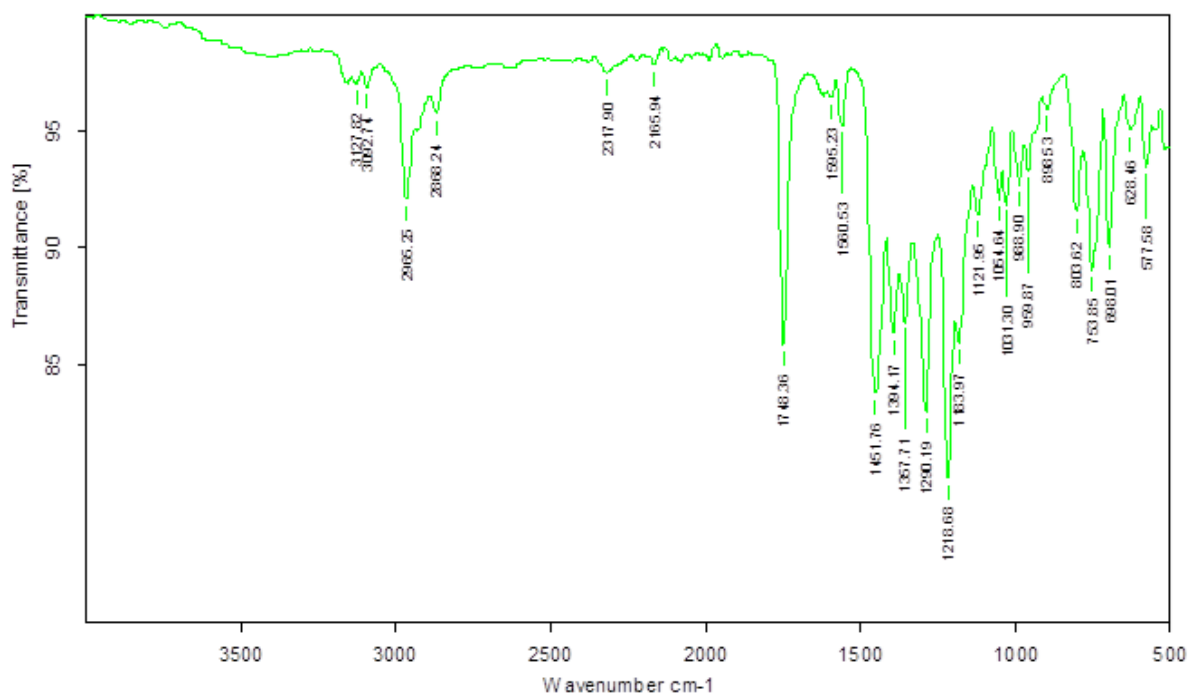**Figure S20.** FT-IR spectrum of **2**.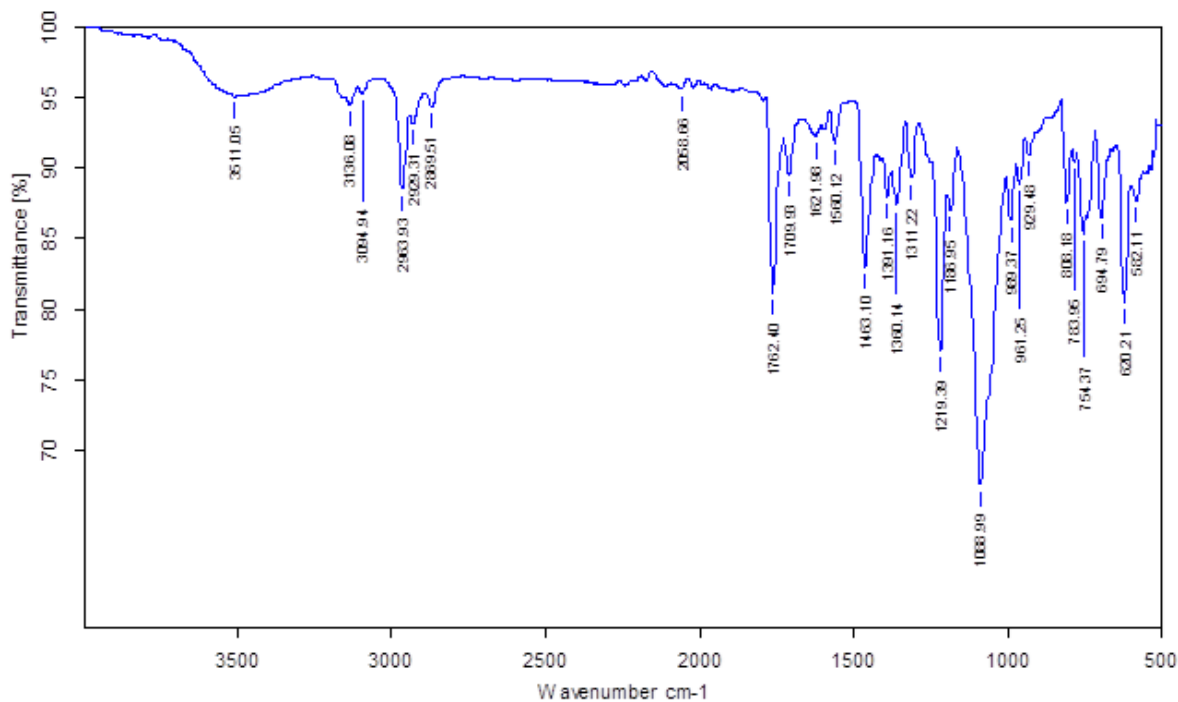

**Figure S21.** FT-IR spectrum of **3**.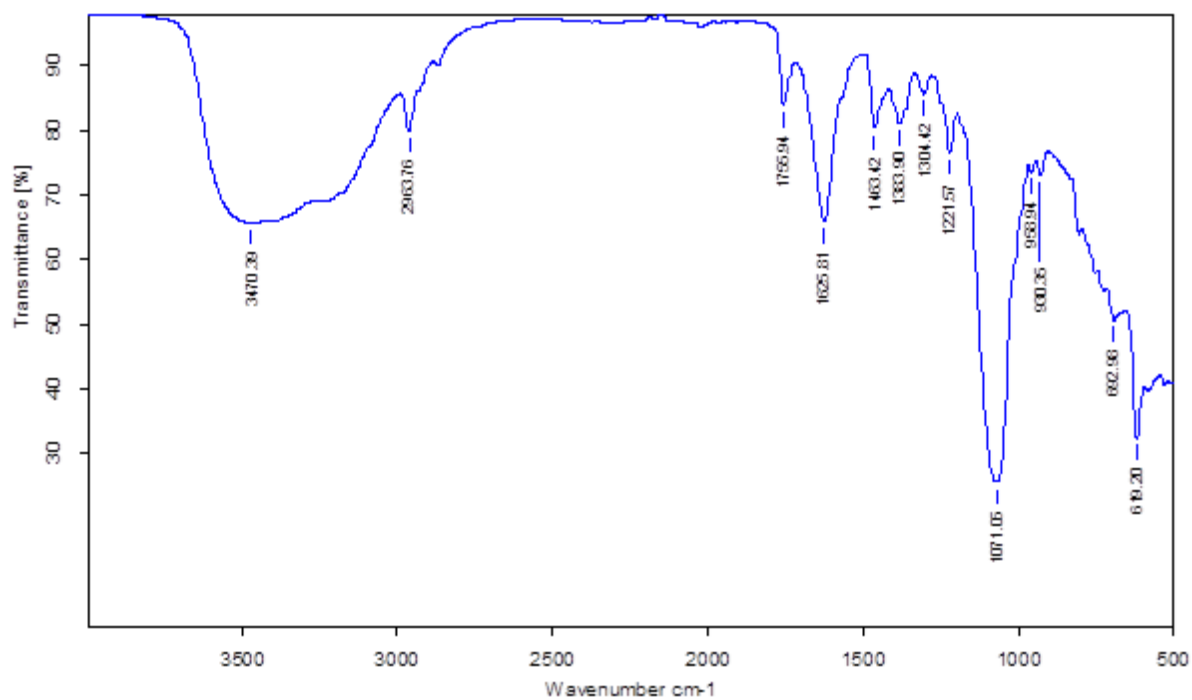**Figure S22.** FT-IR spectrum of **4**.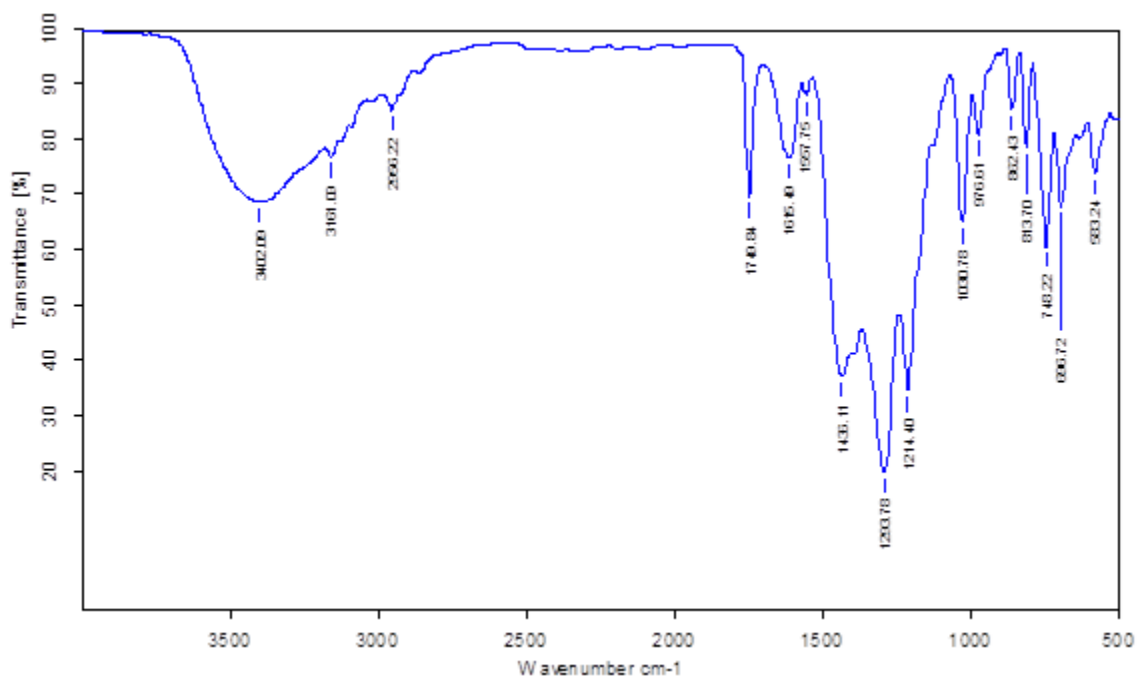

**Figure S23.** FT-IR spectrum of **5**.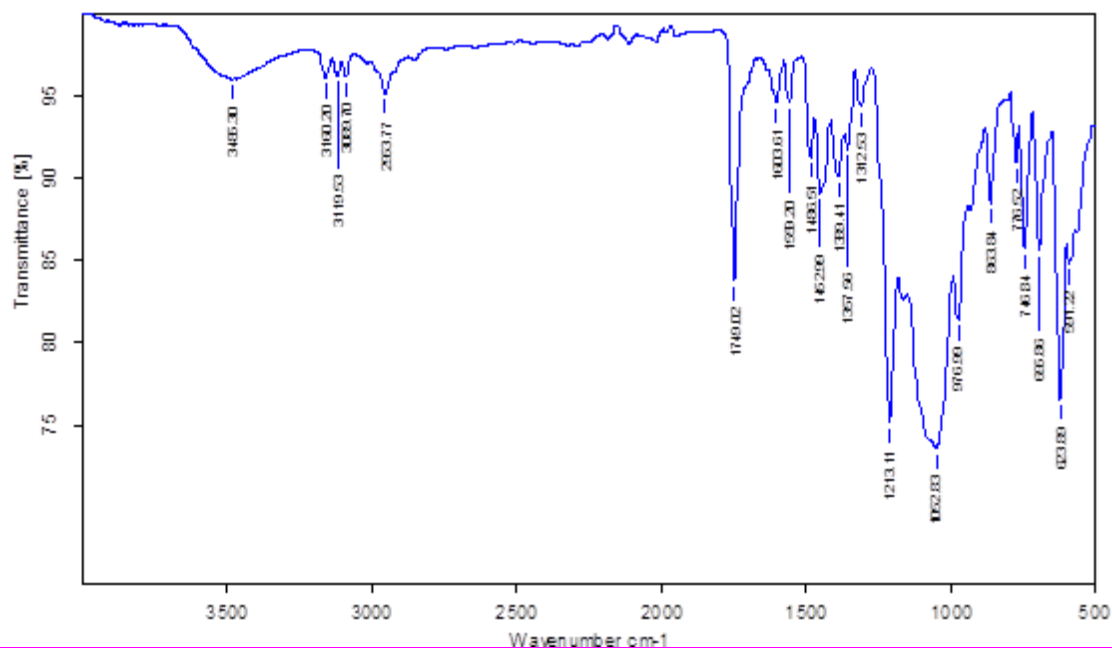**Figure S24.** FT-IR spectrum of **6**.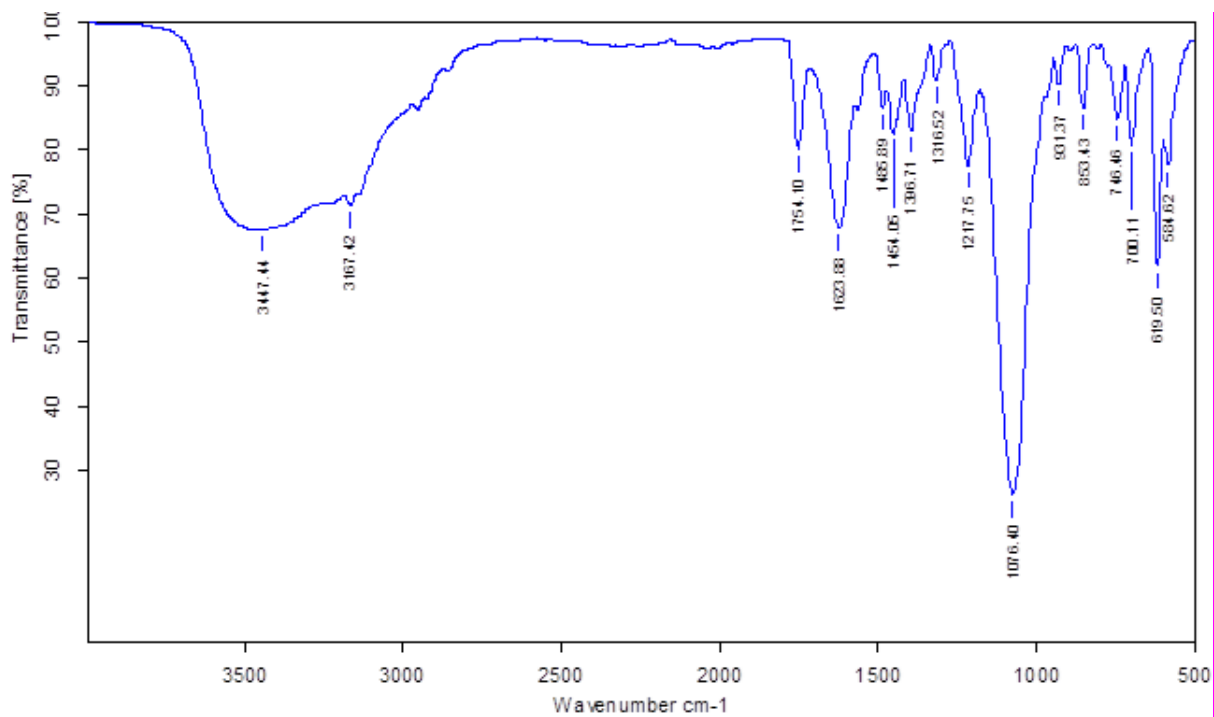

## UV-vis absorption studies of L1, L2 and 1-6.

The solution state UV-vis absorption spectra of **1-6** were recorded in DMSO at room temperature (Fig. 7(i)). In solution state, the UV-vis absorption spectra of **L1**, **L2**, and **1-6** showed nearly comparable absorption patterns. The absorption band observed between 211-218 nm can be attributed to the  $\pi \rightarrow \pi^*$  transition, while the absorption band observed around 270-290 nm can be assigned to the  $n \rightarrow \pi^*$  transition. The solid state UV-vis absorption spectra of **1-6** are not comparable with solution state absorption spectra of **1-6**. In the case of solid state absorption spectra (Fig. 7(ii)), the  $\pi \rightarrow \pi^*$  and  $n \rightarrow \pi^*$  transitions are merged together to give a broad absorption band. In addition, a broad absorption peak from 300 to 650 nm is observed for **1-6** in the solid-state UV-visible absorption study.

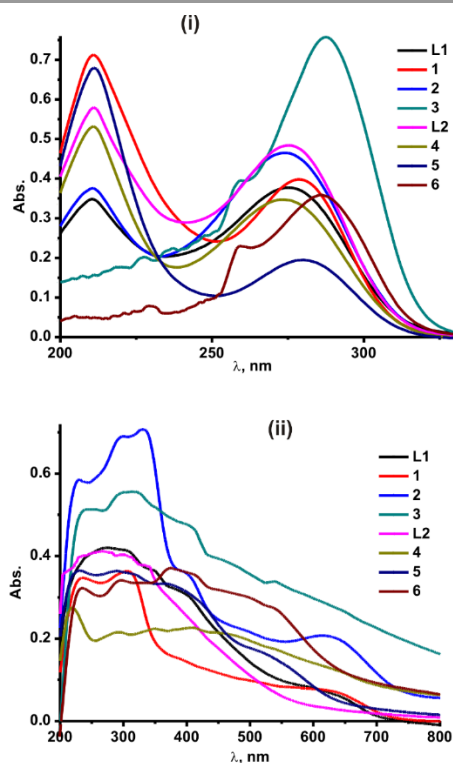

**Figure S25.** (i) Solution state UV-vis spectra of **L1**, **L2** and **1-6** in DMSO at 25 °C ( $3.64 \times 10^{-5}$  M); (ii) Solid state UV-vis spectra of **L1**, **L2** and **1-6** at 25 °C.

### Thermogravimetric analysis of 1-6.

The thermal stability of molecule **1-6** is analyzed by TGA. The figure 8 reveals the thermal breakdown pathway of **1-6** based on thermal investigation under a flowing nitrogen atmosphere ( $10\text{ }^{\circ}\text{C min}^{-1}$ , 30-1000  $^{\circ}\text{C}$ ). A small weight loss about 2–8% was observed for **1-6** in the initial stage ( $<80\text{ }^{\circ}\text{C}$ ), can be attributable to the loss of moisture. Complexes **1-6** and compounds **L1** and **L2** showed a sudden weight loss in single step from 200 to 320  $^{\circ}\text{C}$  range, which can be validated for the decomposition of organic moieties. Subsequently, a gradual weight loss was observed till 1000  $^{\circ}\text{C}$  with 9-25% residue for the metal chalcogenides. Whereas, complexes **1** and **4** displayed an extreme thermal stability till 250-280  $^{\circ}\text{C}$  and showed a gradual weight loss till 1000  $^{\circ}\text{C}$ . Compounds **2** and **6** showed enough stability till 220-240  $^{\circ}\text{C}$  range then showed a sudden weight loss of about 70% till 400  $^{\circ}\text{C}$ . Subsequently, **2** and **6** showed the gradual weight loss till 800  $^{\circ}\text{C}$  with 9-12% residual weights. Complex **3** shows gradual weight loss till 420  $^{\circ}\text{C}$  then remains unchanged till 1000  $^{\circ}\text{C}$ . Similarly complex **5** loses 70% weight around 250  $^{\circ}\text{C}$  then showed the gradual weight loss till 590  $^{\circ}\text{C}$  and remains unchanged till 1000  $^{\circ}\text{C}$ . The ligands **L1** and **L2** loses the major weight within 250  $^{\circ}\text{C}$  then loses almost the rest within 900  $^{\circ}\text{C}$ . The black residue obtained from **1-6** were in accord with the calculated values for the respective metal selenide.

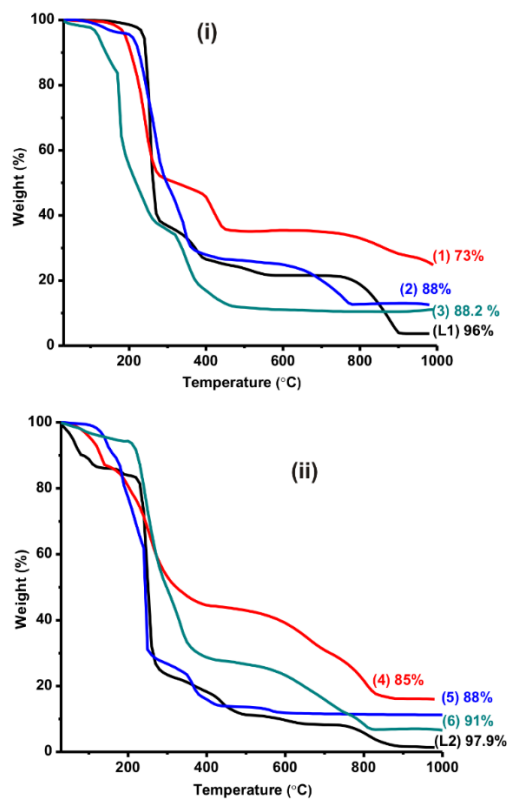

**Figure S26.** (i) TGA curve of L1 and 1-3; (ii) L2 and 4-6 from 30 to 1000 °C under a nitrogen atmosphere with a heating rate of 10 °C min

**Table S1** Crystal data and structure refinement for **L1**

|                                             |                                                                  |
|---------------------------------------------|------------------------------------------------------------------|
| Empirical formula                           | C <sub>10</sub> H <sub>19</sub> N <sub>2</sub> O <sub>4</sub> Se |
| Formula weight                              | 228.77                                                           |
| Temperature/K                               | 298                                                              |
| Crystal system                              | orthorhombic                                                     |
| Space group                                 | P2 <sub>1</sub> 2 <sub>1</sub> 2 <sub>1</sub>                    |
| a/Å                                         | 16.2382(8)                                                       |
| b/Å                                         | 7.0046(4)                                                        |
| c/Å                                         | 15.8492(9)                                                       |
| α/°                                         | 90                                                               |
| β/°                                         | 90                                                               |
| γ/°                                         | 90                                                               |
| Volume/Å <sup>3</sup>                       | 1802.71(16)                                                      |
| Z                                           | 6                                                                |
| ρ <sub>calc</sub> /g/cm <sup>3</sup>        | 1.2643                                                           |
| μ/mm <sup>-1</sup>                          | 2.881                                                            |
| F(000)                                      | 662.7                                                            |
| Crystal size/mm <sup>3</sup>                | 0.07 × 0.05 × 0.05                                               |
| Radiation                                   | Cu Kα (λ = 1.54184)                                              |
| 2θ range for data collection/°              | 7.8 to 142.42                                                    |
| Index ranges                                | -19 ≤ h ≤ 13, -6 ≤ k ≤ 8, -19 ≤ l ≤ 18                           |
| Reflections collected                       | 3951                                                             |
| Independent reflections                     | 2883 [R <sub>int</sub> = 0.0128, R <sub>sigma</sub> = 0.0281]    |
| Data/restraints/parameters                  | 2883/0/183                                                       |
| Goodness-of-fit on F <sup>2</sup>           | 1.649                                                            |
| Final R indexes [I ≥ 2σ (I)]                | R <sub>1</sub> = 0.1277, wR <sub>2</sub> = 0.3537                |
| Final R indexes [all data]                  | R <sub>1</sub> = 0.1433, wR <sub>2</sub> = 0.3852                |
| Largest diff. peak/hole / e Å <sup>-3</sup> | 2.27/-0.95                                                       |
| Flack parameter                             | 0.8(3)                                                           |

**Table S2** Fractional Atomic Coordinates (×10<sup>4</sup>) and Equivalent Isotropic Displacement Parameters (Å<sup>2</sup>×10<sup>3</sup>) for **L1**. U<sub>eq</sub> is defined as 1/3 of the trace of the orthogonalised U<sub>ij</sub> tensor.



| Atom | x         | y          | z         | U(eq)   |
|------|-----------|------------|-----------|---------|
| Se1  | 1445.8(6) | 2577.8(18) | 8685.9(8) | 67.4(5) |
| N1   | 1865(8)   | 6686(16)   | 8541(7)   | 71(3)   |
| N2   | 2856(6)   | 4899(15)   | 8234(6)   | 65(2)   |
| C1   | 2063(9)   | 4787(17)   | 8492(7)   | 67(3)   |
| C4   | 1006(8)   | 7390(20)   | 8730(8)   | 74(3)   |
| C5   | 486(7)    | 7630(20)   | 7919(8)   | 72(3)   |
| O1   | 749(7)    | 7190(40)   | 7233(7)   | 197(12) |
| C7   | 3890(5)   | 2620(17)   | 8695(5)   | 51(2)   |
| C11  | 3412(6)   | 2510(19)   | 7229(5)   | 53(2)   |
| C6   | 3391(6)   | 3304(17)   | 8060(7)   | 57(2)   |
| C8   | 4458(10)  | 1190(30)   | 8466(14)  | 108(7)  |
| C9   | 4498(9)   | 450(30)    | 7688(16)  | 105(6)  |
| C10  | 3985(12)  | 1150(60)   | 7091(15)  | 176(14) |
| O2   | -260(7)   | 7760(20)   | 8062(8)   | 108(4)  |
| C3   | 2490(8)   | 7750(20)   | 8333(10)  | 83(4)   |
| C2   | 3090(11)  | 6810(20)   | 8149(12)  | 89(4)   |
| C12  | 3834(9)   | 2960(50)   | 9572(8)   | 134(11) |
| C13  | 4484(12)  | 4610(30)   | 9844(16)  | 118(7)  |
| C15  | 2806(10)  | 3200(70)   | 6581(9)   | 230(20) |
| C14  | 3630(30)  | 2810(70)   | 10310(40) | 240(20) |
| C0aa | 2451(18)  | 3140(40)   | 6036(18)  | 137(8)  |
| C1aa | 3380(15)  | 4710(40)   | 5952(14)  | 125(7)  |

**Table S3** Anisotropic Displacement Parameters ( $\text{\AA}^2 \times 10^3$ ) for **L1**. The Anisotropic displacement factor exponent takes the form:  $-2\pi^2[h^2a^{*2}U_{11}+2hka^*b^*U_{12}+\dots]$ .

| Atom | U <sub>11</sub> | U <sub>22</sub> | U <sub>33</sub> | U <sub>12</sub> | U <sub>13</sub> | U <sub>23</sub> |
|------|-----------------|-----------------|-----------------|-----------------|-----------------|-----------------|
| Se1  | 41.3(7)         | 72.5(8)         | 88.5(9)         | -3.4(5)         | 11.1(4)         | 2.4(7)          |
| N1   | 76(7)           | 64(5)           | 74(6)           | 6(5)            | 2(5)            | -2(5)           |
| N2   | 57(6)           | 73(6)           | 65(5)           | -1(5)           | 14(5)           | 7(5)            |
| C1   | 83(8)           | 68(6)           | 51(5)           | 13(6)           | 8(5)            | 9(5)            |
| C4   | 48(6)           | 97(9)           | 76(7)           | 5(7)            | 12(4)           | -25(9)          |
| C5   | 57(6)           | 85(8)           | 74(6)           | -19(7)          | 5(5)            | 10(8)           |
| O1   | 79(7)           | 450(40)         | 64(6)           | 93(15)          | 11(5)           | 45(12)          |
| C7   | 34(4)           | 69(5)           | 51(4)           | 3(5)            | 4(3)            | -8(6)           |
| C11  | 37(4)           | 75(6)           | 48(4)           | 13(5)           | -2(3)           | 0(5)            |
| C6   | 38(5)           | 67(5)           | 66(6)           | 12(4)           | 1(4)            | 6(5)            |

|     |        |         |         |          |         |          |
|-----|--------|---------|---------|----------|---------|----------|
| C8  | 61(9)  | 131(14) | 133(15) | 38(10)   | 26(10)  | 60(12)   |
| C9  | 36(7)  | 129(14) | 150(17) | 9(8)     | 32(9)   | 14(13)   |
| C10 | 70(11) | 330(40) | 132(17) | -21(18)  | 52(12)  | -120(20) |
| O2  | 68(6)  | 150(11) | 105(7)  | 48(7)    | -12(5)  | -23(8)   |
| C3  | 45(6)  | 96(10)  | 109(10) | -1(7)    | 10(6)   | -1(9)    |
| C2  | 77(9)  | 82(8)   | 107(11) | -3(8)    | -1(9)   | 17(8)    |
| C12 | 61(7)  | 290(30) | 49(6)   | -20(16)  | 0(5)    | 3(12)    |
| C13 | 71(11) | 119(14) | 163(19) | -14(10)  | -39(12) | -24(14)  |
| C15 | 66(9)  | 580(70) | 51(7)   | -140(20) | -31(6)  | 83(18)   |

**Table S4** Bond Lengths for **L1**.

| Atom | Atom | Length/Å  | Atom | Atom | Length/Å  |
|------|------|-----------|------|------|-----------|
| Se1  | C1   | 1.869(13) | C7   | C12  | 1.413(16) |
| N1   | C1   | 1.371(16) | C11  | C6   | 1.429(15) |
| N1   | C4   | 1.508(18) | C11  | C10  | 1.35(3)   |
| N1   | C3   | 1.300(19) | C11  | C15  | 1.50(2)   |
| N2   | C1   | 1.353(16) | C8   | C9   | 1.34(3)   |
| N2   | C6   | 1.442(14) | C9   | C10  | 1.35(4)   |
| N2   | C2   | 1.399(19) | C3   | C2   | 1.21(2)   |
| C4   | C5   | 1.546(18) | C12  | C13  | 1.63(3)   |
| C5   | O1   | 1.206(18) | C12  | C14  | 1.22(6)   |
| C5   | O2   | 1.237(16) | C15  | C0aa | 1.04(3)   |
| C7   | C6   | 1.378(14) | C15  | C1aa | 1.73(3)   |
| C7   | C8   | 1.41(2)   | C0aa | C1aa | 1.87(4)   |

**Table S5** Bond Angles for **L1**.

| Atom | Atom | Atom | Angle/°   | Atom | Atom | Atom | Angle/°   |
|------|------|------|-----------|------|------|------|-----------|
| C4   | N1   | C1   | 123.0(12) | C15  | C11  | C10  | 124.6(19) |
| C3   | N1   | C1   | 110.9(13) | C7   | C6   | N2   | 118.9(10) |
| C3   | N1   | C4   | 125.9(12) | C11  | C6   | N2   | 119.5(9)  |
| C6   | N2   | C1   | 125.9(10) | C11  | C6   | C7   | 121.6(10) |
| C2   | N2   | C1   | 110.1(11) | C9   | C8   | C7   | 123.1(15) |
| C2   | N2   | C6   | 124.0(12) | C10  | C9   | C8   | 118.2(18) |
| N1   | C1   | Se1  | 131.9(11) | C9   | C10  | C11  | 124.6(17) |
| N2   | C1   | Se1  | 127.4(9)  | C2   | C3   | N1   | 112.4(16) |

|     |     |    |           |      |      |      |           |
|-----|-----|----|-----------|------|------|------|-----------|
| N2  | C1  | N1 | 100.6(11) | C3   | C2   | N2   | 106.0(15) |
| C5  | C4  | N1 | 112.0(9)  | C13  | C12  | C7   | 109.8(17) |
| O1  | C5  | C4 | 121.9(12) | C14  | C12  | C7   | 161(3)    |
| O2  | C5  | C4 | 113.0(11) | C14  | C12  | C13  | 89(3)     |
| O2  | C5  | O1 | 122.0(13) | C0aa | C15  | C11  | 157(5)    |
| C8  | C7  | C6 | 116.3(11) | C1aa | C15  | C11  | 103.8(12) |
| C12 | C7  | C6 | 128.5(13) | C1aa | C15  | C0aa | 81(2)     |
| C12 | C7  | C8 | 114.5(16) | C1aa | C0aa | C15  | 66(2)     |
| C10 | C11 | C6 | 116.2(13) | C0aa | C1aa | C15  | 33.3(11)  |
| C15 | C11 | C6 | 119.2(17) |      |      |      |           |

**Table S6** Crystal data and structure refinement for **L2**.

|                                    |                                                                  |
|------------------------------------|------------------------------------------------------------------|
| Identification code                | <b>L2</b>                                                        |
| Empirical formula                  | C <sub>14</sub> H <sub>18</sub> N <sub>2</sub> O <sub>3</sub> Se |
| Formula weight                     | 341.27                                                           |
| Temperature/K                      | 293(2)                                                           |
| Crystal system                     | monoclinic                                                       |
| Space group                        | P2 <sub>1</sub> /c                                               |
| a/Å                                | 7.6495(3)                                                        |
| b/Å                                | 12.4690(5)                                                       |
| c/Å                                | 16.5823(6)                                                       |
| α/°                                | 90                                                               |
| β/°                                | 92.492(3)                                                        |
| γ/°                                | 90                                                               |
| Volume/Å <sup>3</sup>              | 1580.14(10)                                                      |
| Z                                  | 4                                                                |
| ρ <sub>calc</sub> /cm <sup>3</sup> | 1.4344                                                           |
| μ/mm <sup>-1</sup>                 | 3.298                                                            |
| F(000)                             | 694.7                                                            |
| Crystal size/mm <sup>3</sup>       | 0.17 × 0.16 × 0.12                                               |
| Radiation                          | Cu Kα (λ = 1.54184)                                              |
| 2θ range for data collection/°     | 8.88 to 141.58                                                   |
| Index ranges                       | -9 ≤ h ≤ 5, -15 ≤ k ≤ 14, -20 ≤ l ≤ 19                           |
| Reflections collected              | 6145                                                             |
| Independent reflections            | 2972 [R <sub>int</sub> = 0.0232, R <sub>sigma</sub> = 0.0306]    |
| Data/restraints/parameters         | 2972/0/188                                                       |
| Goodness-of-fit on F <sup>2</sup>  | 1.069                                                            |

Final R indexes [ $I \geq 2\sigma(I)$ ]  $R_1 = 0.0403$ ,  $wR_2 = 0.1088$

Final R indexes [all data]  $R_1 = 0.0514$ ,  $wR_2 = 0.1213$

Largest diff. peak/hole /  $e \text{ \AA}^{-3}$  0.61/-0.66

**Table S7** Fractional Atomic Coordinates ( $\times 10^4$ ) and Equivalent Isotropic Displacement Parameters ( $\text{\AA}^2 \times 10^3$ ) for **L2**.  $U_{eq}$  is defined as 1/3 of the trace of the orthogonalised  $U_{ij}$  tensor.

| Atom | x         | y         | z          | U(eq)    |
|------|-----------|-----------|------------|----------|
| C1   | 2379(4)   | 6089(2)   | 2295.7(18) | 54.8(7)  |
| C2   | 2138(6)   | 4314(3)   | 2376(3)    | 94.0(13) |
| C3   | 3149(6)   | 4524(3)   | 1762(3)    | 92.6(13) |
| C4   | 762(4)    | 5414(3)   | 3450.4(19) | 68.4(9)  |
| C5   | 2048(4)   | 5475(3)   | 4157(2)    | 62.8(8)  |
| C6   | 4286(4)   | 6188(2)   | 1128.8(17) | 52.9(7)  |
| C7   | 3537(4)   | 6423(3)   | 375.9(18)  | 57.5(7)  |
| C8   | 4528(4)   | 6989(3)   | -161.4(18) | 58.9(7)  |
| C9   | 6219(4)   | 7309(2)   | 35.4(19)   | 56.4(7)  |
| C10  | 6938(4)   | 7030(3)   | 789(2)     | 62.4(8)  |
| C11  | 6010(4)   | 6468(3)   | 1346.0(18) | 60.0(7)  |
| C12  | 6811(5)   | 6167(4)   | 2159(2)    | 98.6(14) |
| C13  | 7257(5)   | 7955(3)   | -547(2)    | 77(1)    |
| C14  | 1682(5)   | 6088(4)   | 135(3)     | 94.8(14) |
| N1   | 1654(3)   | 5273(2)   | 2702.3(16) | 64.2(7)  |
| N2   | 3281(3)   | 5627(2)   | 1705.3(15) | 59.2(6)  |
| O1   | 1364(3)   | 5904(2)   | 4790.2(14) | 75.7(7)  |
| O2   | 3529(4)   | 5174(3)   | 4142.0(17) | 95.4(9)  |
| O3   | 3274(3)   | 9209(2)   | 1094.2(16) | 75.5(7)  |
| Se1  | 2145.6(6) | 7519.8(3) | 2524.6(2)  | 72.4(2)  |

**Table S8** Anisotropic Displacement Parameters ( $\text{\AA}^2 \times 10^3$ ) for **L2**. The Anisotropic displacement factor exponent takes the form:  $-2\pi^2[h^2a^{*2}U_{11}+2hka^*b^*U_{12}+\dots]$ .

| Atom | $U_{11}$ | $U_{22}$ | $U_{33}$ | $U_{12}$ | $U_{13}$ | $U_{23}$ |
|------|----------|----------|----------|----------|----------|----------|
| C1   | 54.3(15) | 57.3(17) | 53.7(15) | -3.3(13) | 11.8(12) | -0.3(13) |
| C2   | 124(3)   | 59(2)    | 103(3)   | -24(2)   | 50(3)    | -4(2)    |

|     |          |          |          |           |          |           |
|-----|----------|----------|----------|-----------|----------|-----------|
| C3  | 127(3)   | 51.5(19) | 103(3)   | -17(2)    | 54(3)    | -13.7(19) |
| C4  | 54.3(17) | 89(2)    | 63.3(18) | -8.7(16)  | 20.4(14) | 9.3(17)   |
| C5  | 60.7(18) | 58.4(18) | 70.5(19) | 1.6(15)   | 17.1(15) | 10.3(15)  |
| C6  | 54.1(16) | 52.7(15) | 53.3(15) | -5.2(13)  | 16.0(12) | -7.3(12)  |
| C7  | 46.8(15) | 66.9(18) | 59.5(17) | -5.0(13)  | 9.3(13)  | -13.2(14) |
| C8  | 60.8(17) | 67.6(19) | 48.9(15) | 3.3(15)   | 8.0(13)  | -3.8(14)  |
| C9  | 56.5(17) | 54.5(16) | 59.8(17) | -2.5(13)  | 19.7(13) | -5.9(13)  |
| C10 | 47.6(16) | 72(2)    | 68.8(19) | -6.5(14)  | 10.0(14) | -4.3(16)  |
| C11 | 54.6(16) | 69.6(19) | 56.0(16) | -3.1(14)  | 5.6(13)  | -0.7(14)  |
| C12 | 79(3)    | 142(4)   | 74(2)    | -9(3)     | -10(2)   | 25(3)     |
| C13 | 89(3)    | 69(2)    | 75(2)    | -14.1(19) | 29.8(19) | 1.7(18)   |
| C14 | 59(2)    | 138(4)   | 87(3)    | -20(2)    | 1.7(18)  | -10(3)    |
| N1  | 63.8(15) | 65.9(16) | 64.6(15) | -10.8(13) | 22.7(12) | 3.6(13)   |
| N2  | 63.4(15) | 52.0(13) | 63.9(15) | -10.0(11) | 21.9(12) | -6.6(11)  |
| O1  | 62.5(13) | 95.7(18) | 70.0(14) | 8.5(13)   | 13.8(11) | 0.4(13)   |
| O2  | 73.2(16) | 124(2)   | 88.8(18) | 38.0(16)  | 7.9(13)  | -3.6(17)  |
| O3  | 74.0(15) | 75.4(16) | 78.0(16) | -7.0(13)  | 13.1(12) | 8.8(13)   |
| Se1 | 92.7(3)  | 57.8(3)  | 68.8(3)  | 9.61(17)  | 26.6(2)  | -0.05(16) |

**Table S9** Bond Lengths for **L2**.

| Atom | Atom | Length/Å | Atom | Atom | Length/Å |
|------|------|----------|------|------|----------|
| C1   | N1   | 1.352(4) | C6   | C7   | 1.382(4) |
| C1   | N2   | 1.351(4) | C6   | C11  | 1.396(4) |
| C1   | Se1  | 1.835(3) | C6   | N2   | 1.435(3) |
| C2   | C3   | 1.331(5) | C7   | C8   | 1.388(4) |
| C2   | N1   | 1.370(5) | C7   | C14  | 1.516(5) |
| C3   | N2   | 1.382(4) | C8   | C9   | 1.379(4) |
| C4   | C5   | 1.498(5) | C9   | C10  | 1.388(5) |
| C4   | N1   | 1.452(4) | C9   | C13  | 1.509(4) |
| C5   | O1   | 1.308(4) | C10  | C11  | 1.380(4) |
| C5   | O2   | 1.195(4) | C11  | C12  | 1.504(5) |

**Table S1-** Bond Angles for **L2**.

| Atom | Atom | Atom | Angle/°  | Atom | Atom | Atom | Angle/°  |
|------|------|------|----------|------|------|------|----------|
| N2   | C1   | N1   | 105.9(3) | C9   | C8   | C7   | 121.9(3) |

|     |    |     |          |     |     |     |          |
|-----|----|-----|----------|-----|-----|-----|----------|
| Se1 | C1 | N1  | 125.6(2) | C10 | C9  | C8  | 118.1(3) |
| Se1 | C1 | N2  | 128.5(2) | C13 | C9  | C8  | 121.1(3) |
| N1  | C2 | C3  | 107.9(3) | C13 | C9  | C10 | 120.7(3) |
| N2  | C3 | C2  | 107.1(3) | C11 | C10 | C9  | 122.3(3) |
| N1  | C4 | C5  | 110.9(3) | C10 | C11 | C6  | 117.5(3) |
| O1  | C5 | C4  | 112.1(3) | C12 | C11 | C6  | 120.8(3) |
| O2  | C5 | C4  | 124.0(3) | C12 | C11 | C10 | 121.6(3) |
| O2  | C5 | O1  | 123.9(3) | C2  | N1  | C1  | 109.6(3) |
| C11 | C6 | C7  | 122.0(3) | C4  | N1  | C1  | 123.5(3) |
| N2  | C6 | C7  | 119.5(3) | C4  | N1  | C2  | 126.1(3) |
| N2  | C6 | C11 | 118.5(3) | C3  | N2  | C1  | 109.5(3) |
| C8  | C7 | C6  | 118.1(3) | C6  | N2  | C1  | 125.4(2) |
| C14 | C7 | C6  | 121.8(3) | C6  | N2  | C3  | 125.0(3) |
| C14 | C7 | C8  | 120.1(3) |     |     |     |          |

**Table S11** Hydrogen Atom Coordinates ( $\text{\AA}\times 10^4$ ) and Isotropic Displacement Parameters ( $\text{\AA}^2\times 10^3$ ) for **L2**.

| Atom | <i>x</i> | <i>y</i> | <i>z</i>   | U(eq)     |
|------|----------|----------|------------|-----------|
| H2   | 1817(6)  | 3637(3)  | 2552(3)    | 112.8(16) |
| H3   | 3668(6)  | 4023(3)  | 1432(3)    | 111.1(16) |
| H4a  | -30(4)   | 4818(3)  | 3523.7(19) | 82.1(11)  |
| H4b  | 74(4)    | 6068(3)  | 3421.0(19) | 82.1(11)  |
| H8   | 4039(4)  | 7157(3)  | -668.8(18) | 70.7(9)   |
| H10  | 8086(4)  | 7228(3)  | 924(2)     | 74.9(9)   |
| H12a | 6140(30) | 6480(20) | 2575(2)    | 148(2)    |
| H12b | 6820(40) | 5400(4)  | 2213(9)    | 148(2)    |
| H12c | 7989(17) | 6430(30) | 2207(9)    | 148(2)    |
| H13a | 7840(30) | 7478(3)  | -901(12)   | 115.5(15) |
| H13b | 6482(7)  | 8415(17) | -859(12)   | 115.5(15) |
| H13c | 8110(30) | 8382(18) | -251(2)    | 115.5(15) |
| H14a | 1334(17) | 6420(20) | -370(11)   | 142(2)    |
| H14b | 1631(11) | 5322(5)  | 80(20)     | 142(2)    |
| H14c | 907(8)   | 6310(30) | 542(11)    | 142(2)    |
| H1   | 2060(30) | 5850(40) | 5180(8)    | 113.6(10) |
| H3a  | 3280(50) | 8710(30) | 1450(20)   | 113.3(10) |
| H3b  | 4313(18) | 9430(30) | 1040(20)   | 113.3(10) |



**Table S12:** Structural parameters of **1-6** (CCDC: 1442188-1442193).

| Parameters                              | 1                                                                                 | 2                                                                                                | 3                                                                                                | 4                                                                                  | 5                                                                                                                                   | 6                                                                                                          |
|-----------------------------------------|-----------------------------------------------------------------------------------|--------------------------------------------------------------------------------------------------|--------------------------------------------------------------------------------------------------|------------------------------------------------------------------------------------|-------------------------------------------------------------------------------------------------------------------------------------|------------------------------------------------------------------------------------------------------------|
| Empirical formula                       | C <sub>36</sub> H <sub>48</sub> CdClN <sub>5</sub> O <sub>7</sub> Se <sub>2</sub> | C <sub>48</sub> H <sub>96</sub> O <sub>16</sub> Cl <sub>2</sub> Se <sub>4</sub> CdN <sub>8</sub> | C <sub>48</sub> H <sub>96</sub> N <sub>8</sub> O <sub>16</sub> ZnSe <sub>4</sub> Cl <sub>2</sub> | C <sub>15</sub> H <sub>18</sub> CdCl <sub>2</sub> N <sub>2</sub> O <sub>2</sub> Se | C <sub>7.5</sub> H <sub>9</sub> NO <sub>1.666667</sub> Cd <sub>0.166667</sub> Cl <sub>0.33333</sub> <sup>33</sup> Se <sub>0.5</sub> | C <sub>7.5</sub> H <sub>10.5</sub> NO <sub>3.75</sub> Zn <sub>0.25</sub> Se <sub>0.5</sub> Cl <sub>3</sub> |
| Formula weight                          | 968.57                                                                            | 5386.84                                                                                          | 5373.79                                                                                          | 520.57                                                                             | 1259.16                                                                                                                             | 990.87                                                                                                     |
| Temperature                             | 150                                                                               | 293                                                                                              | 150.01                                                                                           | 293                                                                                | 293                                                                                                                                 | 150                                                                                                        |
| Crystal system                          | monoclinic                                                                        | cubic                                                                                            | cubic                                                                                            | monoclinic                                                                         | trigonal                                                                                                                            | tetragonal                                                                                                 |
| Space group                             | P2 <sub>1</sub> /c                                                                | F-43c                                                                                            | F-43c                                                                                            | P2 <sub>1</sub> /c                                                                 | R-3                                                                                                                                 | P4 <sub>1</sub> 22                                                                                         |
| a/Å                                     | 15.4327(6)                                                                        | 39.4115(4)                                                                                       | 38.8082(5)                                                                                       | 7.3578(2)                                                                          | 14.6180(3)                                                                                                                          | 11.82385(11)                                                                                               |
| b/Å                                     | 9.9492(4)                                                                         | 39.4115(4)                                                                                       | 38.8082(5)                                                                                       | 11.7976(3)                                                                         | 14.6180(3)                                                                                                                          | 11.82385(11)                                                                                               |
| c/Å                                     | 26.6209(9)                                                                        | 39.4115(4)                                                                                       | 38.8082(5)                                                                                       | 21.8444(5)                                                                         | 45.0966(10)                                                                                                                         | 28.5490(4)                                                                                                 |
| α/°                                     | 90.00                                                                             | 90                                                                                               | 90.00                                                                                            | 90                                                                                 | 90                                                                                                                                  | 90                                                                                                         |
| β/°                                     | 91.820(3)                                                                         | 90                                                                                               | 90.00                                                                                            | 93.068(2)                                                                          | 90                                                                                                                                  | 90                                                                                                         |
| γ/°                                     | 90.00                                                                             | 90                                                                                               | 90.00                                                                                            | 90                                                                                 | 120                                                                                                                                 | 90                                                                                                         |
| Volume/Å <sup>3</sup>                   | 4085.4(2)                                                                         | 61216.6(19)                                                                                      | 58448.3(14)                                                                                      | 1893.47(8)                                                                         | 8345.5(3)                                                                                                                           | 3991.24(8)                                                                                                 |
| Z                                       | 4                                                                                 | 8                                                                                                | 8                                                                                                | 4                                                                                  | 6                                                                                                                                   | 4                                                                                                          |
| ρ <sub>calc</sub> /cm <sup>3</sup>      | 1.575                                                                             | 1.113                                                                                            | 1.134                                                                                            | 1.826                                                                              | 1.503                                                                                                                               | 1.6506                                                                                                     |
| Absorption coefficient/mm <sup>-1</sup> | 7.3430                                                                            | 4.103                                                                                            | 2.852                                                                                            | 14.110                                                                             | 6.732                                                                                                                               | 4.785                                                                                                      |
| F(000)                                  | 1952.6                                                                            | 20904.0                                                                                          | 20472.0                                                                                          | 1016.0                                                                             | 3780.5                                                                                                                              | 2000.1                                                                                                     |
| Data collected                          | 14393                                                                             | 11660                                                                                            | 10660                                                                                            | 12418                                                                              | 19412                                                                                                                               | 10355                                                                                                      |
| Unique data                             | 7737                                                                              | 3950                                                                                             | 4783                                                                                             | 3596                                                                               | 3558                                                                                                                                | 3794                                                                                                       |
| R <sub>int</sub>                        | 0.0428                                                                            | 0.0294                                                                                           | 0.0325                                                                                           | 0.0413                                                                             | 0.0391                                                                                                                              | 0.0262                                                                                                     |
| GOF on F <sup>2</sup>                   | 1.037                                                                             | 1.137                                                                                            | 1.103                                                                                            | 0.969                                                                              | 1.032                                                                                                                               | 1.050                                                                                                      |
| R <sub>1</sub> [I>=2σ(I)]               | 0.0690                                                                            | 0.0545                                                                                           | 0.0666                                                                                           | 0.0378                                                                             | 0.0417                                                                                                                              | 0.0622                                                                                                     |
| R <sub>1</sub> values (all data)        | 0.0760                                                                            | 0.0658                                                                                           | 0.0721                                                                                           | 0.0407                                                                             | 0.0449                                                                                                                              | 0.0675                                                                                                     |
| wR <sub>1</sub> values (all data)       | 0.2032                                                                            | 0.1662                                                                                           | 0.1954                                                                                           | 0.1225                                                                             | 0.1475                                                                                                                              | 0.1849                                                                                                     |
